1 **Trickle infection and immunity to *Trichuris muris***

2

3 Maya Glover<sup>1,3¶</sup>, Stefano A.P. Colombo<sup>1,2¶</sup>, David J. Thornton<sup>1,2</sup>, Richard K. Grencis<sup>1,2\*</sup>

4 <sup>1</sup>Lydia Becker Institute of Immunology and Inflammation, University of Manchester, Manchester,  
5 United Kingdom.

6 <sup>2</sup>Wellcome Centre for Cell Matrix Research, University of Manchester, Manchester, United  
7 Kingdom

8 <sup>3</sup>Leucid Bio Ltd, London, United Kingdom

9 Email: [richard.grencis@manchester.ac.uk](mailto:richard.grencis@manchester.ac.uk) (RKG)

10 ¶¶ Maya Glover and Stefano Colombo are joint first authors  
11

12 **Abstract**

13 The majority of experiments investigating the immune response to gastrointestinal helminth  
14 infection use a single bolus infection. However, *in situ* individuals are repeatedly infected with low  
15 doses. Therefore, to model natural infection, mice were repeatedly infected (trickle infection) with  
16 low doses of *Trichuris muris*. Trickle infection resulted in the slow acquisition of immunity reflected  
17 by a gradual increase in worm burden followed by a partial expulsion. Flow cytometry revealed  
18 that the CD4+ T cell response shifted from Th1 dominated to Th2 dominated, which coincided  
19 with an increase in Type 2 cytokines. The development of resistance following trickle infection  
20 was associated with increased worm expulsion effector mechanisms including goblet cell  
21 hyperplasia, Muc5ac production and increased epithelial cell turn over. Depletion of CD4+ T cells  
22 reversed resistance confirming their importance in protective immunity following trickle infection.

23 In contrast, depletion of group 2 innate lymphoid cells did not alter protective immunity. *T. muris*  
24 trickle infection resulted in a dysbiotic microbiota which began to recover alpha diversity following  
25 the development of resistance.

26 These data support trickle infection as a robust and informative model for analysis of immunity to  
27 chronic intestinal helminth infection more akin to that observed under natural infection conditions  
28 and confirms the importance of CD4+ T cell adaptive immunity in host protection.

29

### 30 **Author Summary**

31 Infection with parasitic worms (helminths) is a considerable cause of morbidity in humans.  
32 Understanding how we respond to infection is crucial to developing novel therapies. Laboratory  
33 models of helminth infection have been a valuable tool in understanding fundamental immune  
34 responses to infection. However, typically an individual mouse will be infected with a large, single-  
35 dose of the parasite. This is in contrast to the natural scenario in which individuals will receive  
36 frequent low level exposures. What is unknown is how repeated infection alters the development  
37 of immunity to infection. We have developed a laboratory model to tackle this question. We  
38 infected mice with the model helminth *Trichuris muris* on a weekly basis and assessed a range of  
39 responses in comparison with a more traditional infection system. We found striking differences  
40 in the dynamics of the infection, the host immune response, and in changes to host gut microbial  
41 populations. Our study shows how resistance to helminth infection can develop over time in  
42 response to repeat infection, and provides a model system that better reflects human immunity to  
43 this parasite.

44

### 45 **Introduction**

46 Gastrointestinal (GI) dwelling nematodes infect approximately 1 billion people worldwide causing  
47 significant ill health (1). Prevalence is high in endemic areas although intensity of infection varies

48 with age, suggesting acquired immunity develops, although sterile immunity is rare and individuals  
49 are repeatedly challenged with low numbers of infectious stages throughout their lives (2). Thus,  
50 identifying mechanisms of acquired immunity in human populations is extremely challenging,  
51 however, data is supportive of acquired immunity driven by Type 2 immunity for at least some if  
52 not all the major soil transmitted helminths (STH) *Ascaris lumbricoides*, *Necator americanus*,  
53 *Ancylostoma duodenale* and *Trichuris trichiura* (3). Despite this, it appears to be only partial at  
54 best and takes considerable time to develop (2,4).

55 Animal models of intestinal nematode infection have been widely used to help define mechanisms  
56 of immunity to these types of pathogen (5). Typically rodents are given a single, and sometimes  
57 a second, infection composed of an unnaturally large dose of infectious stages. This approach  
58 has been extremely informative and established that such a robust parasite challenge stimulates  
59 the host to generate host protective responses, dominated by Type 2 immunity. A clear role for  
60 CD4+ Th2 cells is well documented but in addition, recent data indicates that innate immunity  
61 plays a major role in host protection through tuft cell induced Type 2 innate lymphoid cell (ILC2)  
62 production of IL-13 (6–8). Whilst single bolus infections in the laboratory have been central to  
63 defining paradigms of resistance and susceptibility, one major discrepancy between these models  
64 and natural infection in man, and indeed rodents, is that individuals are infected repeatedly with  
65 low dose infections throughout their lifetime and STH are chronic, non-resolving infections.  
66 Studies of repeated low dose nematode infections of rodents are indeed rare (9,10).

67 The mouse whipworm, *Trichuris muris*, is uniquely placed as a model of the human STH *Trichuris*  
68 *trichiura*, in that it exists as a natural chronic infection of wild rodents. The antigenic cross-  
69 reactivity of the two species, similar morphology and same niche of intestinal infection justifies *T.*  
70 *muris* as a suitable parasite to model human infection and has been consolidated by the recent  
71 description of the *T. trichiura* and *T. muris* genomes (11,12). Moreover, the immune responses  
72 required for resistance and susceptibility to *T. muris* are well established and influenced by both

73 infective dose and strain of laboratory mouse. C57BL/6 mice that receive a single high dose  
74 infection develop resistance, dependent on CD4+ Th2 cells (13) and IL-13 production (14). IL-13  
75 induces a number of effector mechanisms that mediate worm expulsion including accelerated  
76 epithelial cell turnover (14–16). *Trichuris* embed in the epithelium of the caecum and with  
77 increased epithelial cell turnover the worm is physically carried out of the epithelium into the lumen  
78 and expelled. In resistant mice, IL-13 also induces goblet cell hyperplasia and elevated Muc2 and  
79 Muc5ac mucins increase during resistance, with deficiency of these mucins causing susceptibility  
80 to infection (17).

81 C57BL/6 mice that receive a single low dose infection of *T. muris* are, in contrast, susceptible  
82 and develop a chronic infection associated with CD4+ Th1 cells, IFN- $\gamma$  production (18) and  
83 subsequent regulation via IL-10 (19,20). Chronic low level *Trichuris* infection is associated with a  
84 dysbiosis of the intestinal microbiota with a reduction in microbial diversity (21,22) that has a  
85 survival benefit for the parasite (23).

86 Here, we have established a natural trickle infection in the mouse using repeated low doses of  
87 eggs to mimic more closely exposure in the field. Following comprehensive immune phenotyping,  
88 we now show that repeated low doses of *T. muris* infection results in the slow development of  
89 partial resistance with the modification of a Type 1 dominated response to a functionally protective  
90 Type 2 immune response. Resistance after this infection regime is dependent on CD4+ T cells  
91 and associated with Muc5ac production and an increase in intestinal epithelial cell turnover,  
92 confirming their importance even after this multi-infection regime. ILC2s, however, did not appear  
93 to play an important role in the development of resistance following *T. muris* trickle infection or  
94 indeed after a single high dose infection, which induces complete Type 2 cytokine mediated  
95 parasite clearance.

96 We believe this infection regime presents a powerful approach to further dissect the host/parasite  
97 relationship of a major neglected tropic disease, trichuriasis, using a highly relevant mouse model  
98 under conditions where the host is challenged by parasite infection in a manner more akin to that  
99 seen under natural infecting conditions. Going forward, this provides a more representative  
100 platform for analysis of potential vaccine candidates and novel anti-helminthics.

101

102

## 103 **Results**

104

### 105 **Development of resistance and Type 2 immune responses following *T. muris* trickle** 106 **infection**

107

108 To replicate a more natural infection regime of *T. muris*, mice were infected weekly with low doses  
109 (20 eggs) for 3, 5, 7 or 9 weeks (S1). Two weeks after the final infection worm burden and immune  
110 responses were analyzed. Total worm burden revealed *Trichuris* worm numbers increased  
111 through weeks 5 to 9 post infection (p.i.) followed by a significant decrease by week 11 (Fig 1A).  
112 Faecal egg counts at week 11 mice followed a similar pattern and suggested a significant  
113 reduction in worm burden occurs after week 9 (Fig 1B). When *Trichuris* eggs hatch in the caecum,  
114 L1 larvae are released and undergo a series of moults, L2-L4, before developing into adult worms.  
115 Larval stages were counted and revealed an absence of early larval stages at week 11 (Fig 1C).  
116 Analysis of CD4+ T helper cell subsets from large intestinal lamina propria revealed a shift from  
117 a Th1 dominated response during susceptibility at week 9, to a Th2 dominated immune response,  
118 associated with resistance at week 11 (Fig 1D). The peak in Th2 cells coincided with an increase  
119 capacity to produce IL-13 and no significant change in IFN- $\gamma$  production (Fig 1E). Analysis of

120 CD4+ T cell subpopulations from MLNs did not show any significant changes following *T. muris*  
121 trickle infection during the period of resistance (S2).

122

123 Previous work has demonstrated that antibody responses are not required for resistance to single  
124 *T. muris* infections (18,19). Antibody responses specific for *T. muris* adult and larval antigens  
125 were analysed following trickle infection. Type 1 IgG2a/c antibody and Type 2 IgG1 antibody  
126 steadily increased throughout the complete infection time course (S3). No distinct difference in  
127 antibody responses against each larval stage was apparent (excluding responses against L1  
128 antigens which remained low throughout trickle infection). Additionally, total IgE levels did not  
129 significantly increase throughout trickle infection (S3).

130

131 Goblet cell number and goblet cell size increased consistently throughout the course of the trickle  
132 regime peaking at week 11 when resistance had been established (Fig 2A-C). Crypt length, an  
133 indicator of gut inflammation, increased during trickle infection (Fig 2D). Sections were stained  
134 with HID-AB to visualize the changes in mucin glycosylation in the caecum (Fig 2E). Following  
135 low dose *T. muris* infection mucins become sialylated and are more vulnerable to degradation by  
136 *T. muris* products (17,24). However, following high dose *T. muris* infection mucins stay sulphated  
137 (20). During *T. muris* trickle mucins remained sialylated throughout.

138

139 Goblet cells produce a number of protective mucins and secreted proteins during resistance to *T.*  
140 *muris* (17). To determine which goblet cell proteins were correlated with resistance during trickle  
141 infection, the expression of a number of goblet cell associated genes was assessed. There was  
142 a specific increase in Muc5ac expression at week 11 after trickle infection when resistance  
143 developed (Fig 3A). The increase in Muc5ac was confirmed by western blot on secreted mucus.  
144 The majority of trickle infected mice showed an increase in secreted Muc5ac (Fig 3B). Muc2 is

145 also associated with resistance in *T. muris* models of infection (25). Despite no significant  
146 increase in gene expression, staining of caecal sections revealed an increase in Muc2 positive  
147 cells during the development of resistance in trickle infection (Fig 3C). Relm- $\beta$  (and to a lesser  
148 extent TFF3) have also been associated with resistance in *T. muris* infection (26); despite no  
149 increase in TFF3, Relm- $\beta$  expression significantly increased during the generation of resistance  
150 in trickle infection (Fig 3A).

151

152 An increase in epithelial cell turnover occurs in resistance of *T. muris* following a high dose  
153 infection and hypothesized to physically move the parasite out of its optimal intestinal niche  
154 resulting in expulsion (16). To determine whether increased turnover was induced during  
155 resistance following trickle infection, mice were injected with BrdU to assess cell turnover (27). A  
156 significant increase in epithelial cell turnover was observed during the generation of resistance at  
157 week 11 of trickle infection (Fig 4A-B) although, no increase in amphiregulin gene expression was  
158 observed (Fig 4C) (27).

159

160 **Resistance developed following *T. muris* trickle infection is long lasting and protects**  
161 **against subsequent infection**

162

163 To determine whether the resistance that developed following *T. muris* trickle infection was  
164 maintained even in the absence of active infection, trickled mice were challenged following either  
165 the natural eventual loss of worms or following anti-helminthic treatment. Faecal egg counts were  
166 assessed to determine when all worms had been expelled and the animals were then challenged  
167 at week 30. After a single low dose infection, mice were still susceptible to a challenge low dose  
168 whereas single high dose infected mice were able to expel a challenge low dose infection. Trickle  
169 infected mice were protected against subsequent infection, similar to high dose infected mice (Fig

170 5A). Mice in which parasites had been removed via anti-helminthic treatment were re-challenged  
171 at week 13 with a single low dose of 20 eggs. Compared to naïve control mice, trickle infected  
172 mice had significantly lower worm burdens, confirming that trickle infection could generate partial  
173 protection to subsequent challenge infections (Fig 5B).

174

### 175 **CD4+ T cells are essential for the development of resistance following trickle infection**

176

177 To determine whether innate or adaptive cells were responsible for the development of resistance  
178 following trickle infection, RAG<sup>-/-</sup> mice were infected with repeated low doses following the week  
179 11 infection regime. Although C57BL/6 mice developed resistance at this time point, RAG<sup>-/-</sup> mice  
180 did not expel worms steadily building up worm numbers, confirming adaptive immune responses  
181 were essential for resistance (Fig 6A). To define a role for CD4<sup>+</sup> T cells in the development of  
182 trickle-induced resistance, C57BL/6 mice were treated with anti-CD4 antibody between week 8  
183 and 11, when we observe resistance developing. Depletion of CD4<sup>+</sup> T cells was confirmed by  
184 flow cytometry (Fig 6B). This reduction resulted in a significant increase in total worm burden at  
185 week 11 which included adult worms and all larval stages (Fig 6 C-D). Furthermore, depletion of  
186 CD4<sup>+</sup> T cells resulted in a significant reduction in associated effector mechanisms including goblet  
187 cell hyperplasia, Muc5ac and Relm- $\beta$  expression and epithelial cell turnover (Fig 7). There were  
188 negligible reductions in the *T. muris* specific antibody response following CD4<sup>+</sup> T cell depletion  
189 (S4).

190

### 191 **Innate lymphoid cells play little role in resistance following *T. muris* trickle infection**

192

193 ILCs have been shown to play indispensable roles during resistance in multiple model helminth  
194 infections including *N. brasiliensis* and *H. polygyrus* (28,29). To determine the role of ILCs during



195 *T. muris* trickle infection, ILCs were analysed by flow cytometry. Total intestinal ILC proportions  
196 decreased following the development of resistance at week 11 during trickle infection (Fig 8A).  
197 Total ILC numbers decreased over the infection period compared to naïve animals and this was  
198 reflected by a reduction in ILC2 and ILC3 proportions relative to ILC1s (Fig 8A). Analysis of ILC  
199 populations in the MLN showed no changes during the trickle infection regime, including no  
200 changes in ILC2 populations (S5). Additionally, previous research has demonstrated that tuft cells  
201 proliferate following *N. brasiliensis* and *H. polygyrus* infection and play a key role in inducing  
202 expansion of ILC2s by secreting IL-25 (8). During *T. muris* trickle infection there was a small but  
203 significant increase tuft cell numbers (identified by *dclk1* expression) in the caecum despite a  
204 significant decrease in ILC2s at this time point. No change in tuft cell numbers in the small  
205 intestine was observed (Fig 8B). To confirm the role of ILC2s during *T. muris* trickle infection,  
206 ICOS-T mice that can be specifically depleted for ILC2s by DTx treatment were used (29). Mice  
207 were infected repeatedly using the week 11 trickle regime and received DTx or PBS control  
208 treatment at week 8-10 when resistance is observed to develop (Fig 9A). DTx treatment resulted  
209 in a significant reduction in total ILC2 in the caecum (Fig 9B). This depletion did not alter worm  
210 burdens and therefore the development of resistance following *T. muris* trickle infection (Fig 9C).  
211 High dose infections (~200 eggs in a single bolus) are a well-established model of Th2-dependent  
212 resistance to *T. muris* (30). Using ICOS-T mice, we observe that ILC2 depletion following a single  
213 high dose infection did not alter worm expulsion relative to control mice (S6).

214

### 215 **Immune responses during trickle infection**

216

217 A number of studies suggest that individuals naturally infected by helminths have altered  
218 susceptibility to atopy and asthma when assessed by skin prick testing to common allergens (31–  
219 33). To determine whether *T. muris* trickle infection can alter the allergic response, *T. muris*  
220 infected mice were sensitized with the allergen OVA. Local immediate hypersensitivity in the skin

221 was measured following OVA challenge and revealed that a neither a single low dose or trickle  
222 *T. muris* infection altered the local immediate hypersensitivity response as compared to  
223 uninfected animals (S7).

224

225 In helminth endemic countries it is common to observe that individuals are infected with multiple  
226 helminth species include multiple GI nematodes such as whipworm and hookworm (34) and a  
227 variety of laboratory co-infection studies have shown that infection by one species of GI nematode  
228 can affect the response to another (35–37) although always with single high doses of the  
229 respective parasites. In order to investigate the effect of a trickle *T. muris* infection upon another  
230 GI nematode infection mice were additionally challenged with a single high dose of *N. brasiliensis*  
231 a model of human hookworm infection. However, co-infection following trickle (or indeed a single  
232 low dose infection by *T. muris*) did not alter worm expulsion kinetics of *T. muris* or *N. brasiliensis*  
233 (S8).

234

235

236 **Dysbiosis of the intestinal microbiome begins to resolve following the development of**  
237 **resistance in *T. muris* trickle infection**

238

239 It has previously been demonstrated that chronic *T. muris* infection following a single low dose  
240 infection results in a dysbiotic microbiome (21). Using 16S sequencing we compared changes in  
241 the composition of the microbiota between low dose infections and trickle infection (S9). Both low  
242 dose and trickle infection induced shifts in the microbiota composition demonstrated by NMDS  
243 analysis (Fig 10 A-B). Trickle infection promoted a more significant change in the biota at week  
244 11 compared to the low dose. For low dose infection this change in the microbiota was largely  
245 consistent between week 9 and week 11. However, under a trickle infection, at week 11, a partial  
246 shift back towards the naïve groups was observed, coinciding with the development of resistance

247 to infection. To elucidate where these changes were occurring, alpha diversity of the most  
248 abundant bacterial phyla were quantified using Shannon indexes. Both infection regimes showed  
249 a significant reduction in overall Shannon diversity at week 9 (Fig 10 C-D). However, at week 11  
250 when resistance had developed, population diversity began to recover in trickle infected mice (Fig  
251 11D). This recovery of diversity appeared to predominate in the Bacteroidetes phylum (Fig 10D),  
252 and was not seen in low dose infection (Fig 10C). This trend could also be observed at the genus  
253 level, where some of the most abundant genera present in the naïve mice at both time points  
254 were diminished or could no longer be detected in trickled mice at week 9, but were present at  
255 week 11 (Fig 11).

256

## 257 **Discussion**

258

259 Although our knowledge of the immune responses to gastrointestinal nematodes is continuously  
260 expanding, the majority of research follows infection after a single high or low dose. However, *in*  
261 *situ* individuals are repeatedly infected with low doses of infection. As human studies are  
262 inherently limited and animal models following single infection often show conflicting results when  
263 compared to human studies, it is desirable to ensure we are correctly modeling natural infection.  
264 Here we functionally characterized the response to infection following a more representative  
265 regime by infecting mice repeatedly with low doses, named trickle infection, with the whipworm  
266 *T. muris*.

267

268 Following trickle infection, we show resistance developed concurrently with intestinal immune  
269 responses shifting from CD4+ Th1 cell dominated to a CD4+ Th2 cell dominated response. The  
270 development of Type 2 responses coincided with a significant reduction in worm burden including  
271 both adult worms and larval stages. Absence of early larval stages suggests that the resistance  
272 was targeted/most effective against incoming larval stages. Adult worms, however, persisted until

273 week 30 shown by continued low faecal egg output. Therefore, only partial resistance was  
274 induced, which is similar to that seen in naturally infected individuals with human whipworm (2).  
275 Indeed, acquired immunity to most human STHs is slow to develop and incomplete, with ‘resistant’  
276 individuals in endemic regions harboring low numbers of parasites (2). Previous studies using  
277 repeated *T. muris* low dose infection over a much shorter time frame (six infections over a 11 day  
278 infection period) suggested host genetics also influenced the capacity to generate resistance,  
279 although association between resistance and immune response type was difficult to define (38).  
280 Following the present *T. muris* trickle regime the acquisition of resistance was associated with  
281 elevated IL-13 production and IL-13-mediated effector mechanisms including goblet cell  
282 hyperplasia, Muc5ac production, mucin sulphation, and increased epithelial cell turnover, as seen  
283 in previous studies using a single high dose infection to induce resistance (14,16,17,20). Although  
284 immunity induced by trickle infection reduced worm numbers significantly it was not able to  
285 completely clear infection, as a low level of infection with adult worms persisted. The reasons for  
286 this are unclear although may be related to the size and niche occupied by the parasite in  
287 combination with ongoing parasite induced immunomodulatory mechanisms (39). For example,  
288 adult parasites are extensively embedded within epithelial tunnels, with the anterior of each worm  
289 “sewn” through thousands of epithelial cells (40,41) which physically presents a considerable  
290 challenge to remove. Previous work has suggested that the IL-13 controlled epithelial escalator  
291 was most successful at expelling worms at approximately day 14 post infection when smaller  
292 larval stages reside in the lower/mid region of the crypt where epithelial cells move faster (14).  
293 Furthermore, following anti-helminthic treatment and challenge infection, trickle infected mice had  
294 reduced worm burdens but again were unable to completely expel worms, confirming only partial  
295 resistance is induced to even long-term challenge. This would suggest that under conditions of  
296 repeated low dose infection such as encountered naturally, complete removal of the parasite  
297 burden may be difficult to achieve especially once adult worms are present and given that drug-

298 treatment does not alter immune status significantly. It also predicts that infection would be highly  
299 prevalent in the population with most individuals infected by low numbers of worms.

300

301 The data presented here demonstrates a central role for CD4+ T cells in the development of  
302 resistance to *T. muris* trickle infection. This is consistent with other models of resistance to  
303 *Tirchuris* infection (19,42). Following CD4+ T cell depletion, worm expulsion and associated  
304 effector mechanisms were reduced. Robust *T. muris* specific antibody responses were generated  
305 during trickle infection, with high levels apparent prior to induction of resistance by week 11.  
306 Depletion of CD4+ T cells reduced resistance but had negligible effect upon the antibody  
307 response to *T. muris* suggesting little role for antibody in resistance induced by trickle infection.  
308 This is in keeping with the data from single high-dose infection studies in *T. muris*, where it is  
309 clear that antibody is not required for resistance (19). Also, mice deficient in FcγR are resistant to  
310 infection (43), as are mice deficient in *Aicda*, which are unable to class switch or develop high  
311 affinity antibody infection (3i consortium). Interestingly, this is not the case for other models of GI  
312 nematode infection such as *H. polygyrus* where antibody does play a role in host resistance  
313 particularly during a secondary infection (44). This may reflect the different niches occupied by  
314 the parasites underpinning the concept of multiple/redundant Type 2 controlled protective  
315 responses against these large multicellular pathogens. This is also evident in the present work  
316 regarding the role of ILC2 in host protection. IL-13 is key to resistance to multiple GI nematode  
317 infections and ILC2 are a potent source of this cytokine (28,29) with these cells sufficient for  
318 resistance to *N. brasiliensis* infection (29). Here we suggest that ILC2s have little/no role in  
319 resistance against *T. muris* infection following either a trickle infection or a single high dose  
320 infection. A major driver of the ILC2 response following intestinal parasite infection has been  
321 identified as the tuft cell, which produces IL-25 promoting ILC2 expansion and IL-13 production  
322 (7,8,44). The tuft cell response is muted during *T. muris* infection compared to other systems such

323 as *N.brasiliensis*, *H. polygyrus* and *T. spiralis* (7,8,45). Previous work has shown that IL-25 null  
324 mice are susceptible to a high single dose *T. muris* infection although no increase in IL-25 mRNA  
325 expression was found following infection in WT mice. Interestingly, resistance and a Th2 response  
326 was recovered in IL-25 null mice when IL-12 was blocked suggesting that resistance did not  
327 absolutely require IL-25 (46). The present data supports a poor IL-25 response following *T. muris*  
328 infection as evidenced by minimal changes in tuft cell numbers. The difference between *Trichuris*  
329 and other model systems studied may be due both the infection regime/dose used and significant  
330 differences in life strategies evolved by the different species of parasite. Certainly, most models  
331 have used high dose bolus infections to stimulate strong Type 2 immunity including ILC2  
332 responses. A strong induction of ILC2 and as a consequence, a considerable source IL-13, may  
333 provide rapid and sufficient induction of appropriate effector mechanisms required to expel the  
334 parasites (47). Also, *T. muris* is distinct from other GI model systems in that to progress to patency  
335 it induces a Th1 response as part of its strategy to survive whereas even in systems where chronic  
336 infection occurs (e.g. *H. polygyrus* infection) it is set against induction and subsequent modulation  
337 of a Type2/Th2 response (48).

338

339 The intestinal region which *Trichuris* inhabits is also relatively unique when compared to other  
340 enteric helminths, with the caecum being its preferred site (16). It is not surprising therefore that  
341 *T. muris* can induce an intestinal dysbiosis following chronic infection (21,22) that is dependent  
342 upon the presence of worms (21). During trickle infection we now show a dysbiosis in the intestinal  
343 microbiome, distinct from single low dose infected mice, that begins to resolve once partial  
344 resistance develops. We found that high abundance genera present in naïve mice that were lost  
345 or reduced at 9 weeks p.i. in trickled mice were found to return following the observed  
346 development of resistance, as well as an overall increase in alpha diversity. It is tempting to  
347 speculate that given sufficient time the microbiota would return to a naïve-like phenotype despite  
348 the continued presence of *T. muris*. Microbiome studies from humans naturally infected with GI

349 nematodes including whipworm have been carried out with varied outcomes regarding the  
350 influence of helminth infection (49–51). This may be explained in part by confounding factors  
351 including co-infection, diet, age and level of worm burden. However, it has been suggested that  
352 *T. trichiura* infection alone is not sufficient to alter the intestinal microbiome (50). Our data  
353 supports a more dynamic view of the relationship between the microbiota, and infection and  
354 immunity with *Trichuris* species. We suggest that during early recurrent infections, when the host  
355 is still susceptible, *Trichuris* alone is capable of driving dysbiosis. However, at the point where a  
356 protective immunity is attained, the microbiota will begin to return to a more homeostatic  
357 composition characteristic of un-infected individuals.

358

359 There is conflicting data as to the influence of chronic helminth/GI nematode infection upon the  
360 incidence of allergic responses e.g. skin prick tests in humans (52). With regards to model  
361 systems studies using chronic *H. polygyrus* infections have shown that allergic lung responses  
362 are muted compared to non-infected animals (53,54) and single low dose chronic infections with  
363 *T. muris* also influence lung allergic responsiveness (55). Low dose chronic *T. muris* infection also  
364 mutes contact hypersensitivity response to Th1 contact sensitizing agents but not Th2 sensitizing  
365 agents (16). Chronic *H. polygyrus* infection modulated responses to both Th1 and Th2 skin  
366 sensitizing agents (16). Here, we show that trickle *T. muris* infection does not modulate an  
367 immediate (IgE) hypersensitivity response in the skin (nor does a single low dose infection).

368

369 It is also common in endemic regions for individuals to be infected by multiple species of GI  
370 nematode, including skin penetrating species e.g. hookworm (56–58). In order to assess whether  
371 such an infection would influence or be influenced by a *T. muris* trickle infection a single dose of  
372 *N. brasiliensis* was superimposed. Neither parasite appeared to be affected in terms of resistance  
373 status at least with regards to the timing and challenge regime used here.

374

375 Overall, the present work demonstrates that partial Type 2 mediated resistance to whipworm,  
376 similar to that seen under natural infection, can be generated under laboratory conditions using  
377 repeated low dose infection. Functionally, immunity is dependent upon CD4+ Th2 cells and a role  
378 for ILC2s could not be established. This approach will complement and extend those models  
379 already used for study of immunity to GI nematodes and importantly highlight key differences  
380 allowing a more rationale comparison to the field situation.

381

## 382 **Materials and Methods**

### 383 **Animals**

384

385 C57BL/6, RAG-/- and iCOS-T (kindly provided by Dr A N McKenzie),(29) mice were maintained  
386 in individually ventilated cages in the University of Manchester animal facility in accordance with  
387 Home office regulations (1986). Mice were housed for at least 7 days prior to experimentation  
388 and were 6-8 weeks old males.

### 389 **Ethics Statement**

390 Experiments were performed on licence number P043A3082 under the regulation of the Home  
391 Office Scientific Procedures Act (1986), and were approved by the University of Manchester  
392 Animal Welfare and Ethical Review Body.

### 393 **Parasitological techniques**

394

395 Mice were infected with *Trichuris muris* embryonated eggs weekly for 3, 5 or 9 weeks. Mice  
396 received 20 eggs in 200µl of dH<sub>2</sub>O by oral gavage. Two weeks following the final infection, worm  
397 burdens and immune responses were analysed. Caeca were collected from infected mice and



398 parasites sorted into L2, L3, L4 larval stages and adult worms for counting. Faecal egg output  
399 was analysed by suspending stool pellets in saturated NaCl and counting in a McMaster  
400 Chamber, eggs per g of faeces was calculated.

401

402 Mice were infected with 500 *Nippostrongylus brasiliensis* stage 3 larvae (L3) by subcutaneous  
403 injection. To determine worm burden of *N. brasiliensis* the lungs and small intestine of infected  
404 mice were collected at autopsy. The lungs were placed onto gauze and chopped into small pieces.  
405 The gauze containing lung tissue was suspended in 50ml of PBS and incubated at 37°C for 4  
406 hours to allow parasites to move from the tissue and to be counted. The lung tissue was then  
407 digested in 1mg/ml collagenase D (Sigma) 0.5mg/ml Dispase (Sigma) in RPMI 1640 medium and  
408 incubated at 37°C on a rotator. Digested lung tissue was centrifuged and re-suspended in PBS  
409 and parasites were counted. Small intestine was split longitudinally and place in gauze suspended  
410 in PBS. After incubation at 37°C for 4 hours, worms were counted.

411

#### 412 **Production of *T. muris* Excretory/ Secretory products**

413

414 To produce *T. muris* excretory/secretory products (E/S) for immunological techniques, the  
415 parasite was passaged through SCID mice that are susceptible to infection. SCIDs received a  
416 high dose of approximately 400 *T. muris* embryonated eggs and at approximately day 35-42 p.i.  
417 the large intestine was collected to produce adult E/S. To produce L4 E/S mice were culled at day  
418 28 p.i. To produce L3 E/S mice were culled at day 20 p.i. Guts were collected and longitudinally  
419 split open and washed in warmed 5x penicillin/streptomycin in RMPI 1640 medium. Adult, L4 and  
420 L3 worms were carefully pulled from the gut using fine forceps and transferred to a 6 well plate  
421 containing 4ml warmed 5x pen/strep in RMPI 1640 medium. Plates were placed into a moist  
422 humidity box and incubated for 4 hours a 37°C. Adult worms were then split into 2 wells containing

423 fresh medium and incubated again in a humidity box at 37°C overnight. Supernatant from 4 hour  
424 and 24 hour incubation was collected and centrifuged at 2000g for 15 minutes. *T. muris* eggs from  
425 adult worms were resuspended in 40ml deionised water and filtered through a 100µm nylon sieve  
426 before transferring to a cell culture flask. To allow embryonation, eggs were stored in darkness  
427 for approximately 8 weeks and then stored at 4°C. Susceptible mice were subsequently infected  
428 with a high dose infection to determine infectivity of each new batch of eggs.

429 To produce L2 E/S, SCID mice were infected with a high dose of *T. muris* and at day 14 p.i. guts  
430 were collected and placed in 5 x pen/strep in PBS. Guts were cut longitudinally and were washed  
431 to remove faecal debris. The guts were cut into small sections and added to 0.9% NaCl in PBS  
432 and incubated in a water bath at 37°C for two hours to allow L2 larvae to come free from the  
433 epithelium.

434 L2 larvae were removed from the NaCl and placed into 5 x pen/strep RPMI 1640 medium and  
435 incubated overnight at 37°C. The following day the larvae and RPMI 1640 medium was  
436 centrifuged at 720g and the E/S was recovered.

437 To produce L1 E/S, eggs were hatched in 2ml sodium hypochlorite (Fisher chemical) in 4ml H<sub>2</sub>O  
438 for 2 hours at 37°C. L1 larvae were washed in RPMI 1640 medium, 10% FCS, 100 unit/ml of  
439 penicillin, 100µl/ml of streptomycin until media returned to original colour. Larvae were cultured  
440 at 37°C for 3 weeks with media being collected and replaced twice a week.

441 All E/S supernatant was collected and filter sterilised through a 0.2 µm syringe filter (Merck). E/S  
442 was concentrated using an Amicon Ultra-15 centrifugal filter unit (Millipore) by spinning at 3000g  
443 for 15 minutes at 4°C. E/S was dialysed against PBS using Slide-A-Lyzer Dialysis Cassettes,  
444 3.500 MWCO (Thermo Science) at 4°C. The concentration of E/S was measured using the

445 Nanodrop 1000 spectrophotometer (Thermo Fisher Science) and aliquoted before storing at -  
446 20°C.

447

448 **CD4+ T cell depletion and treatment of iCOS-T mice with diphtheria toxin for innate**  
449 **lymphoid cell 2 depletion**

450

451 *In vivo* depletion of CD4+ T cells was achieved by administration of rat IgG2b anti-mouse CD4  
452 (GK1.5, BioXCell). Control animals were treated with the matched isotype control antibody (LTF-  
453 2, BioXCell). Animals were treated 3 times a week for 3 weeks with 200µg antibody in 200µl by  
454 intraperitoneal (IP) injection.

455

456 ICOS-T mice were treated with diphtheria toxin (DTx, Merck) to induce specific depletion of ILC2s.  
457 Mice received 750ng DTX in 200µl by IP injection once a day for 5 days. Control mice received a  
458 PBS control injection (20).

459

460 **CD4+ T cell and innate lymphoid cell quantification by Flow cytometry**

461

462 Lymph nodes were pressed through a 100µm nylon cell strainer (Fisher Scientific) and cells were  
463 pelleted by centrifugation at 400g for 5 minutes. The supernatant was removed and the pelleted  
464 MLN cells were resuspended in 1ml of complete RPMI.

465 The large intestine was opened longitudinally with blunt ended scissors and cut into 0.5cm  
466 segments before washing in 2% foetal calf serum (FCS) in Hank's Balanced Salt Solution (HBSS)  
467 (Sigma, Life Sciences). To remove epithelial cells, large intestine segments were added to 2mM

468 Ethylenediaminetetraacetic acid (EDTA)/HBSS and incubated on a rotator for 15 minutes at 37°C.  
469 Samples were strained through a metal strainer and were washed in 2% FCS HBSS. Gut  
470 segments were incubated in EDTA/HBSS for 30 minutes at 37°C on a rotator. To isolate lamina  
471 propria lymphocytes (LPLs), large intestine segments were added to an enzyme cocktail of  
472 0.85mg/ml Collagenase V (Sigma), 1.25mg/ml Collagenase D (Roche), 1mg/ml Dispase (Gibco,  
473 Life Technologies) and 30µg/ml DNase (Roche) in 10ml complete RPMI (Sigma, Life Sciences).  
474 Samples were incubated on a rotator at 37°C for 45 minutes or until all tissue was digested.  
475 Samples were passed through a cell strainer (Fisher Scientific) resuspended in complete RPMI.  
476 MLN and large intestine cell suspension were stained with 1µl of Fixable Viability Dye  
477 (eBioscience) to identify live cells. Samples were fixed and permeabilised using the  
478 Foxp3/Transcription Factor Staining Buffer Set (eBioscience) and blocked for non-specific binding  
479 by incubating samples in 50µl Anti-Mouse CD16/CD32 Fc Block (eBioscience). Samples were  
480 stained for cell surface and intracellular markers. Samples were read on a BD LSRFortessa flow  
481 cytometer (BD Biosciences) running FACSDiva acquisition and analysed using FlowJo X (Tree  
482 Star, Inc).  
483  
484 Cell surface markers: primary antibodies anti-CD11b (CR3a); anti-NK1.1 (PK126); anti-Ly6G (Gr-  
485 1); anti-CD11c (N418); anti-CD45R (RA3-6B2); anti-CD19 (1D3); anti-TER-119 (TER-119); anti-  
486 CD49b (DX5); anti-F4/80 (BM8); anti-FCεR1 (MAR1); anti-CD4 (RM4-5); anti-CD45 (30-F11);  
487 anti-CD127 (A7R34); anti-TCR-beta (H57-597) and anti-CD8a (53-6.7) purchased from  
488 eBioscience. Primary anti-CD90.2 (30-H12) and secondary streptavidin PE Dazzel purchased  
489 from Biolegend. Intracellular markers: anti-GATA3 (16E10A23); anti-Tbet (ebio4BIO); anti-Roryt

490 (B2D); anti-FOXP3 (FJK-16s) purchased from ebioscience. Primary antibodies were used at  
491 dilutions 1:50-1:800. Secondary antibodies used at 1:1000 dilution.

492

493

494 **Quantification of parasite specific IgG1 and IgG2a/c by ELISA** Blood was collected from mice  
495 at autopsy and serum was isolated. ImmunoGrade plates (BrandTech Scientific, Inc) were coated  
496 with 5µg/ml *T. muris* excretory secretory (E/S) product from Adult, L4, L2, L2 or L1 parasites.

497 Plates were washed using a Skatron Scan Washer 500 (Molecular Devices, Norway) 5 times with  
498 PBST following each incubation. Plates were blocked with 3% bovine serum albumin (BSA). A  
499 double dilution of serum samples was added to plates with a starting dilution of 1:20. Biotinylated  
500 rat anti-mouse IgG1/c (1:2000, Biorad) or rat anti-mouse IgG2a (1:1000, BD Pharmigen) was  
501 added to plates followed by Streptavidin peroxidase (Sigma). Plates were developed with ABTS  
502 (10% 2,2'azino 3-thyl benzthiazoline) and read at 405nm with 490nm reference on a Dynex  
503 MRX11 microplate reader (Dynex Technologies).

#### 504 **Histology and immunofluorescence**

505 Caecal tips were collected and fixed in Carnoy's solution. Sections were paraffin embedded and  
506 5µm sections were mounted onto slides for staining. To analysed caecal crypts and goblet cell  
507 counts sections were stained with periodic acid Schiff's reagent (PAS) and counterstained with  
508 Meyers haematoxylin(Sigma). To analyse mucin sulphation, sections were stained with High- Iron  
509 Diamine-Alcian Blue (HID-AB). Images were visualised using an Axioskop upright microscope  
510 using the Axiovision software.

511

512 To stain for Brdu, muc2 and tuft cells, sections were stained with primary anti-BRDU (BU1/75,  
513 BioRad), anti-muc2 antibody, 1:200 dilution (5501, gift from D. Thornton) or anti-Dclk1 antibody,

514 1:800 dilution (Abcam) at 1:800 dilution). Sections were washed in PBS and incubated in  
515 secondary antibody goat anti-rabbit Af488 (Life technologies) for 1 hour at room temperature.  
516 Nuclear structures were stained with DAPI. An Olympus BX51 upright microscope was used to  
517 visualise staining using MetaVue software.

## 518 **Intestinal microbiome analysis**

519

520 Stool samples were collected from mice and DNA was extracted using the QIAamp DNA stool  
521 mini kit (Qiagen) according to manufacturer's instructions. To characterise the gut microbiome  
522 the 16S rRNA gene was amplified using 16S primers that target the V3/V4 region. Forward  
523 primer: 5'-TCGTCGGCAGCGTCAGATGTGTATAAGAGACAGCCTACGGGNGGCWGCAG-3'.

524 Reverse primer: 5'-

525 GTCTCGTGGGCTCGGAGATGTGTATAAGAGACAGGACTACHVGGGTATCTAATCC-3'.

526 Samples were amplified using the following conditions: 10-50 ng of template DNA, 12.5 µL of 2x

527 KAPA HiFi HotStart ReadyMix, 5 µL each of 1 µM forward and reverse primers in a 25 µL

528 reaction. The cycle parameters are as follows: 95°C 3 min, then 25 cycles of 95°C 30 s; 55 °C

529 30: 72 °C s: with a final step of 72 °C for 3 min. The 16S amplicons were purified using AMPure

530 XP magnetic bead purification. Samples were indexed using the Nextera XT index kit and then

531 quantified by Illumina Miseq in the Genomic Technologies Core Facility at the University of

532 Manchester. Sequences were trimmed using Trimmomatic then clustered into OTUs with a

533 sequence similarity of 97% and taxonomy was assigned in QIIME (59) using the SILVA132

534 database. Statistical analysis and non-metric Multidimensional Scaling (NMDS) were performed

535 using the R-package. OTU counts were normalised using the DESeq2 package (60). Shannon

536 diversity, PERMANOVA tests, and rarefaction were performed using the Vegan package.

537 NMDS plots represent Euclidian distances plotted in arbitrary two dimensional space centred on

538 zero. Stress is a measure of quality of fit of Bray-Curtis dissimilarities where less than 0.2  
539 indicates good fit on two dimensional plots. NMDS and bubble graphs were produced using the  
540 ggplot2 package.

#### 541 **Gene expression of gut associated genes**

542 Caecal tips were collected at autopsy and RNA was extracted using the TRIzol method  
543 (Invitrogen). cDNA was generated using the GoScript Reverse Transcriptase kit (Promega).  
544 Quantitative-PCR was set up using the SensiFAST SYBR Hi-ROX kit (Bioline) on a StepONE  
545 system (Applied Biosystems). Genes of interest were normalised against  $\beta$ -actin and expressed  
546 as fold change compared to naïve mRNA expression. Muc2: F:5'GTCCAGGGTCTGGATCACA.  
547 R:5' CAGATGGCAGTGAGCTGAGC. Muc5ac: F:5' GTGATGCACCCATGATCTATTTTG R:5';  
548 ACTCGGAGCTATAACAGGTCATGTC. Relm- $\beta$ : F:5' GCTCTTCCCTTTCTTCTCCAA R:5'  
549 AACACAGTGTAGGCTTCATGCTGTA. TFF3: F:5' TTATGCTGTTGGTGGTCCTG. R:5'  
550 CAGCCACGGTTGTTACTG.  $\beta$ -actin: F: 5' TCTTGGGTATGGAATGTGGCA  
551 R:5'ACAGCACTGTGTTGGCATAGAGGT. TSLP: F:5' AGCAAGCCAGTCTGTCTCGTGAAA R:  
552 TGTGCCAATTCCTGAGTACCGTCA Ampliregulin: F:5' TCTGCCATCATCCTCGCAGCTATT  
553 R:5' CGGTGTGGCTTGGCAATGATTCAA. Bacterial load: F: 5' TCCTACGGGAGGCAGCAG. R:  
554 5' GGA CTACCAGGGTATCTAATCTT.

555

#### 556 **Mucus extraction and analysis**

557

558 Mucus was extracted by flushing large intestines with PBS and shaking in 2M urea. Samples were  
559 reduced by dithiothreitol (DTT) and run on a 1% agarose gel in TAE buffer. Mucins were  
560 transferred onto a nitrocellular membrane, blocked with casein and probed using chicken anti-

561 mouse Muc5ac antibody (Rockland) followed by an incubation with the goat anti-chicken IgY  
562 AF790 (Abcam). The membrane was imaged using the Odyssey CLx Imaging system (Licor) on  
563 Image studio software (15).

#### 564 **MLN re-stimulation and cytokine analysis by Cytometric bead assay (CBA)**

565  
566 Mesenteric lymph nodes (MLNs) were isolated at autopsy and cells were restimulated with  
567 50µg/ml *T. muris* adult ES. Cells were incubated for 48 hours at 37°C, 5% CO<sub>2</sub>. Supernatant  
568 from cell cultures were incubated with a capture bead cocktail for cytokines of interest (BD  
569 Bioscience), containing one for each cytokine. Detection beads (BD Bioscience), diluted in  
570 detection reagent (BD Bioscience) was added to each well and incubated. Plates were washed  
571 and resuspended in 70µl wash buffer (BD Bioscience). Cytokines were measured on a  
572 MACSQuant Analyser (Miltenyi Biotec) and analysed using the FCAP array software in reference  
573 to a standard curve.

574

#### 575 **Measurement of skin immediate hypersensitivity**

576 Mice were sensitised with 50µg ovalbumin (OVA, Sigma) in 2mg Alum (Thermo Scientific) by  
577 I.P. injection. Control mice were injected with PBS in Alum. Mice received one dose a week for  
578 3 weeks. Two weeks after the final injection the anaphylaxis assay was performed.

579 Mice were anaesthetised by 2% isoflurane. Mice were injected subcutaneously with 5µg OVA in  
580 10µl PBS into one ear and 10µl PBS into the other. The ear was stabilised onto a falcon tube to  
581 aid injections. After 3 minutes 200µl of 0.5% Evans Blue dye (Sigma) was injected into the tail



582 vein. After 10 minutes, mice were euthanised and ears were removed and placed into 700µl  
583 Formamide (Sigma). The ears were incubated overnight at 63°C to allow dye to leak into the  
584 Formamide. 300µl of each sample was transferred into a 96 well plate in duplicate and read on  
585 a VersaMax Microplate reader (Molecular Devices) at 620nm.

## 586 **Statistical analysis**

587 Statistical analysis completed using a one-way ANOVA, followed by post-hoc Tukey's test or an  
588 unpaired t-test using GraphPad Prism 7 software.

589

## 590 **Acknowledgements**

591 We thank A. McKenzie (LMB) for providing iCOS-T mice; A. Bancroft for help with  
592 infection; L. Campbell for help with immediate hypersensitivity experiments; M. Lawson  
593 for advice and feedback on microbiota analysis. We also thank the Faculty of Biology,  
594 Medicine & Health core facility services at the University of Manchester, including  
595 Genomic Technologies, Histology, Flow Cytometry, BSF, and Bioimaging. In particular  
596 we thank P. Wang in the Bioinformatics Core Facility for his help in the processing of  
597 sequencing data.

598

599

## 600 **References**

- 601 1. Pullan RL, Smith JL, Jasrasaria R, Brooker SJ. Global numbers of infection and  
602 disease burden of soil transmitted helminth infections in 2010. *Parasites and*  
603 *Vectors*. 2014;7(1):1–19.
- 604 2. Cooper PJ. Mucosal immunology of geohelminth infections in humans. *Mucosal*  
605 *Immunol*. 2009;2(4):288–99.

- 606 3. Hotez PJ, Pearce EJ, Jacobson J, Hotez PJ, Brindley PJ, Bethony JM, et al.  
607 Helminth infections : the great neglected tropical diseases Find the latest version :  
608 Review series Helminth infections : the great neglected tropical diseases. *J Clin*  
609 *Invest.* 2008;118(4):1311–21.
- 610 4. Hotez PJ, Alvarado M, Basanez MG, Bolliger I, Bourne R, Boussinesq M, et al.  
611 The Global Burden of Disease Study 2010: Interpretation and Implications for the  
612 Neglected Tropical Diseases. *PLoS Negl Trop Dis.* 2014;8(7).
- 613 5. Grencis RK. Immunity to Helminths: Resistance, Regulation, and Susceptibility to  
614 Gastrointestinal Nematodes. *Annu Rev Immunol.* 2015;33(1):201–25.
- 615 6. Gerbe F, Sidot E, Smyth DJ, Ohmoto M, Matsumoto I, Dardalhon V, et al.  
616 Intestinal epithelial tuft cells initiate type 2 mucosal immunity to helminth  
617 parasites. *Nature.* 2016;529(7585):226–30.
- 618 7. Von Moltke J, Ji M, Liang HE, Locksley RM. Tuft-cell-derived IL-25 regulates an  
619 intestinal ILC2-epithelial response circuit. *Nature.* 2016;529(7585):221–5.
- 620 8. Lavoie S, Michaud M, Tran S V., Margolskee RF, Gallini CA, Weinstock J V., et  
621 al. Tuft cells, taste-chemosensory cells, orchestrate parasite type 2 immunity in  
622 the gut. *Science (80- ).* 2016;351(6279):1329–33.
- 623 9. Ovington KS. Trickle infections of *Nippostrongylus brasiliensis* in rats. *Z*  
624 *Parasitenkd.* 1986;72(6):851–3.
- 625 10. Brailsford TJ, Behnke JM. The dynamics of trickle infections with *Ancylostoma*  
626 *ceylanicum* in inbred hamsters. *Parasitology.* 1992 Oct;105 ( Pt 2):247–53.
- 627 11. Roach, T.I.A.; Wakelin, D.; Else, K.J.; Bundy DA. Antigenic cross-reactivity  
628 between the human whipworm, *Trichuris trichiura*, and the mouse trichuroids  
629 *Trichuris muris* and *Trichinella spiralis*. *Parasite Immunol.* 1988;10(3):279–91.
- 630 12. Foth BJ, Tsai IJ, Reid AJ, Bancroft AJ, Nichol S, Tracey A, et al. Whipworm  
631 genome and dual-species transcriptome analyses provide molecular insights into  
632 an intimate host-parasite interaction. *Nat Genet.* 2014;46(7):693–700.
- 633 13. Else KJ, Grencis RK. Cellular immune responses to the murine nematode  
634 parasite *Trichuris muris*. I. Differential cytokine production during acute or chronic  
635 infection. *Immunology.* 1991;72(4):508–13.
- 636 14. Cliffe LJ, Humphreys NE, Lane TE, Potten CS, Booth C, Grencis RK. Accelerated  
637 Intestinal Epithelial Cell Turnover: A New Mechanism of Parasite Expulsion  
638 Author(s): Laura J. Cliffe, Neil E. Humphreys, Thomas E. Lane, Chris S. Potten,  
639 Cath Booth and Richard K. Grencis Source: *Science (80- ).*  
640 2005;308(5727):1463–5.
- 641 15. Bancroft AJ, McKenzie AN, Grencis RK. A critical role for IL-13 in resistance to  
642 intestinal nematode infection. *J Immunol.* 1998;160(7):3453–61.
- 643 16. Cliffe LJ, Grencis RK. The *Trichuris muris* System: a Paradigm of Resistance and  
644 Susceptibility to Intestinal Nematode Infection. 2004;57(04):255–307.
- 645 17. Hasnain SZ, Evans CM, Roy M, Gallagher AL, Kindrachuk KN, Barron L, et al.  
646 *Muc5ac*: a critical component mediating the rejection of enteric nematodes. *J Exp*  
647 *Med.* 2011;208(5):893–900.
- 648 18. Selby GR, Wakelin D. Transfer of immunity against *Trichuris muris* in the mouse  
649 by serum and cells. *Int J Parasitol.* 1973;3(6):717–21.
- 650 19. Else KJ, Grencis RK. Antibody-independent effector mechanisms in resistance to  
651 the intestinal nematode parasite *Trichuris muris*. *Infect Immun.* 1996;64(8):2950–

- 652 4.  
653 20. Hasnain SZ, Dawson PA, Lourie R, Hutson P, Tong H, Grecis RK, et al.  
654 Immune-driven alterations in mucin sulphation is an important mediator of  
655 *Trichuris muris* helminth expulsion. *PLoS Pathog.* 2017;13(2):1–20.  
656 21. Houlden A, Hayes KS, Bancroft AJ, Worthington JJ, Wang P, Grecis RK, et al.  
657 Chronic *Trichuris muris* infection in C57BL/6 mice causes significant changes in  
658 host microbiota and metabolome: Effects reversed by pathogen clearance. *PLoS*  
659 *One.* 2015;10(5).  
660 22. Holm JB, Sorobetea D, Kiilerich P, Ramayo-Caldas Y, Estellé J, Ma T, et al.  
661 Chronic *Trichuris muris* infection decreases diversity of the intestinal microbiota  
662 and concomitantly increases the abundance of lactobacilli. *PLoS One.*  
663 2015;10(5):1–22.  
664 23. White EC, Houlden A, Bancroft AJ, Goldrick M, Hayes KS, Roberts IS, et al.  
665 Manipulation of host and parasite microbiotas: Survival strategies during chronic  
666 nematode infection. *Sci Adv.* 2018;4(3):eaap7399.  
667 24. Hasnain SZ, McGuckin MA, Grecis RK, Thornton DJ. Serine Protease(s)  
668 Secreted by the Nematode *Trichuris muris* Degrade the Mucus Barrier. *PLoS*  
669 *Negl Trop Dis.* 2012;6(10).  
670 25. Hasnain SZ, Wang H, Ghia JE, Haq N, Deng Y, Velcich A, et al. Mucin Gene  
671 Deficiency in Mice Impairs Host Resistance to an Enteric Parasitic Infection.  
672 *Gastroenterology.* 2010;138(5):1763-1771.e5.  
673 26. Artis D, Wang ML, Keilbaugh SA, He W, Brenes M, Swain GP, et al.  
674 RELMbeta/FIZZ2 is a goblet cell-specific immune-effector molecule in the  
675 gastrointestinal tract. *Proc Natl Acad Sci U S A.* 2004;101(37):13596–600.  
676 27. Zaiss DM, Yang L, Shah PR, Kobie JJ, Urban JF, Mosmann TR. Amphiregulin, a  
677 T H 2 cytokine enhancing resistance to nematodes. *Science (80- ).*  
678 2006;314(5806):1746.  
679 28. Pelly VS, Kannan Y, Coomes SM, Entwistle LJ, Rückerl D, Seddon B, et al. IL-4-  
680 producing ILC2s are required for the differentiation of TH2 cells following  
681 *Heligmosomoides polygyrus* infection. *Mucosal Immunol.* 2016;  
682 29. Oliphant CJ, Hwang YY, Walker JA, Salimi M, Wong SH, Brewer JM, et al.  
683 MHCII-mediated dialog between group 2 innate lymphoid cells and CD4 + T cells  
684 potentiates type 2 immunity and promotes parasitic helminth expulsion. *Immunity.*  
685 2014;41(2):283–95.  
686 30. Else KJ, Finkelman FD, Maliszewski CR, Grecis RK. Cytokine-mediated  
687 regulation of chronic intestinal helminth infection. *J Exp Med.* 1994;179(1):347–  
688 51.  
689 31. Van Den Biggelaar AHJ, Van Ree R, Rodrigues LC, Lell B, Deelder AM,  
690 Kremsner PG, et al. Decreased atopy in children infected with *Schistosoma*  
691 *haematobium*: A role for parasite-induced interleukin-10. *Lancet.*  
692 2000;356(9243):1723–7.  
693 32. Chico ME, Vaca MG, Rodriguez A, Cooper PJ. Soil-transmitted helminth parasites  
694 and allergy: Observations from Ecuador. *Parasite Immunol.* 2018;(June 2018):1–  
695 11.  
696 33. Mpairwe H, Amoah AS. Parasites and allergy: Observations from Africa. *Parasite*  
697 *Immunol.* 2018;(July):1–9.

- 698 34. Mohammed KA, Khamis IS, Lello J, Viney ME, Knopp S, Utzinger J. The relative  
699 contribution of co-infection to focal infection risk in children. *Proc R Soc B Biol Sci.*  
700 2013;280(1754):20122813–20122813.
- 701 35. Behnke JM, Wakelin D, Wilson MM. *Trichinella spiralis*: Delayed rejection in mice  
702 concurrently infected with *Nematospiroides dubius*. *Exp Parasitol.*  
703 1978;46(1):121–30.
- 704 36. Jenkins SN, Behnke JM. Impairment of primary expulsion of *trichuris muris* in  
705 mice concurrently infected with *nematospiroides dubius*. *Parasitology.*  
706 1977;75(1):71–8.
- 707 37. Behnke JM, Ali NMH, Jenkins SN. Survival to patency of low level infections with  
708 *Trichuris muris* in mice concurrently infected with *Nematospiroides dubius*. *Ann*  
709 *Trop Med Parasitol.* 1984;78(5):509–17.
- 710 38. Bancroft AJ, Else KJ, Humphreys NE, Grecis RK. The effect of challenge and  
711 trickle *Trichuris muris* infections on the polarisation of the immune response. *Int J*  
712 *Parasitol.* 2001;31(14):1627–37.
- 713 39. Bancroft AJ, Levy CW, Jowitt TA, Hayes KS, Thompson S, Mckenzie EA, et al.  
714 The major secreted protein of the whipworm parasite tethers to matrix and inhibits  
715 interleukin-13 function. *Nat Commun.* 2019;10(1):2344.
- 716 40. Lee TDG, Wright KA. The morphology of the attachment and probable feeding  
717 site of the nematode *Trichuris muris* (Schrank, 1788) Hall, 1916. *Can J Zool.*  
718 1978;56(9):1889–905.
- 719 41. Tilney LG, Connelly PS, Guild GM, Vranich KA, Artis D. Adaptation of a nematode  
720 parasite to living within the mammalian epithelium. *J Exp Zool Part A Comp Exp*  
721 *Biol.* 2005;303(11):927–45.
- 722 42. Betts J, deSchoolmeester ML, Else KJ. *Trichuris muris*: CD4+ T cell-mediated  
723 protection in reconstituted SCID mice. *Parasitology.* 2000;121 Pt 6(May):631–7.
- 724 43. Betts CJ, Else KJ, Elisa M-. Mast cells are not critical in resistance to *Trichuris*  
725 *muris*. 1999;(May 1998):45–52.
- 726 44. McCoy KD, Stoel M, Stettler R, Merky P, Fink K, Senn BM, et al. Polyclonal and  
727 Specific Antibodies Mediate Protective Immunity against Enteric Helminth  
728 Infection. *Cell Host Microbe.* 2008;4(4):362–73.
- 729 45. Gerbe F, Legraverend C, Jay P. The intestinal epithelium tuft cells: Specification  
730 and function. *Cell Mol Life Sci.* 2012;69(17):2907–17.
- 731 46. Owyang AM, Zaph C, Wilson EH, Guild KJ, McClanahan T, Miller HRP, et al.  
732 Interleukin 25 regulates type 2 cytokine-dependent immunity and limits chronic  
733 inflammation in the gastrointestinal tract. *J Exp Med.* 2006;203(4):843–9.
- 734 47. Klose CSN, Mahlaköiv T, Moeller JB, Rankin LC, Flamar AL, Kabata H, et al. The  
735 neuropeptide neuromedin U stimulates innate lymphoid cells and type 2  
736 inflammation. *Nature.* 2017;549(7671):282–6.
- 737 48. Maizels RM, Smits HH, McSorley HJ. Modulation of Host Immunity by Helminths:  
738 The Expanding Repertoire of Parasite Effector Molecules. *Immunity.*  
739 2018;49(5):801–18.
- 740 49. Lee SC, Tang MS, Lim YAL, Choy SH, Kurtz ZD, Cox LM, et al. Helminth  
741 Colonization Is Associated with Increased Diversity of the Gut Microbiota. *PLoS*  
742 *Negl Trop Dis.* 2014;8(5).
- 743 50. Cooper P, Walker AW, Reyes J, Chico M, Salter SJ, Vaca M, et al. Patent Human

- 744 Infections with the Whipworm, *Trichuris trichiura*, Are Not Associated with  
745 Alterations in the Faecal Microbiota. *PLoS One*. 2013;8(10).
- 746 51. Rosa BA, Supali T, Gankpala L, Djuardi Y, Sartono E, Zhou Y, et al. Differential  
747 human gut microbiome assemblages during soil-transmitted helminth infections in  
748 Indonesia and Liberia. *Microbiome*. 2018;6(1):1–19.
- 749 52. Alcantara-Neves NM, Veiga R V., Ponte JCM, Da Cunha SS, Simões SM, Cruz  
750 AA, et al. Dissociation between skin test reactivity and anti-aeroallergen IgE:  
751 Determinants among urban Brazilian children. *PLoS One*. 2017;12(3):1–13.
- 752 53. Wilson MS, Taylor MD, Balic A, Finney CAM, Lamb JR, Maizels RM. Suppression  
753 of allergic airway inflammation by helminth-induced regulatory T cells. *J Exp Med*.  
754 2005;202(9):1199–212.
- 755 54. Zaiss MM, Rapin A, Lebon L, Dubey LK, Mosconi I, Sarter K, et al. The Intestinal  
756 Microbiota Contributes to the Ability of Helminths to Modulate Allergic  
757 Inflammation. *Immunity*. 2015;43(5):998–1010.
- 758 55. Chenery AL, Antignano F, Burrows K, Scheer S, Perona-Wright G, Zaph C. Low-  
759 Dose Intestinal *Trichuris muris* Infection Alters the Lung Immune  
760 Microenvironment and Can Suppress Allergic Airway Inflammation. *Infect Immun*.  
761 2016;84(2):491–501.
- 762 56. Kan SP. Soil-transmitted helminthiasis in Selangor, Malaysia. *Med J Malaysia*.  
763 1982;37(2):180–90.
- 764 57. Al-Delaimy AK, Al-Mekhlafi HM, Nasr NA, Sady H, Atroosh WM, Nashiry M, et al.  
765 Epidemiology of Intestinal Polyparasitism among Orang Asli School Children in  
766 Rural Malaysia. *PLoS Negl Trop Dis*. 2014;8(8).
- 767 58. Raso G, Luginbühl A, Adjoua CA, Tian-Bi NT, Silué KD, Matthys B, et al. Multiple  
768 parasite infections and their relationship to self-reported morbidity in a community  
769 of rural Côte d'Ivoire. *Int J Epidemiol*. 2004;33(5):1092–102.
- 770 59. Caporaso JG, Kuczynski J, Stombaugh J, Bittinger K, Bushman FD, Costello EK,  
771 et al. QIIME allows analysis of high-throughput community sequencing data  
772 Intensity normalization improves color calling in SOLiD sequencing. *Nat Publ Gr*.  
773 2010;7(5):335–6.
- 774 60. Love MI, Huber W, Anders S. Moderated estimation of fold change and  
775 dispersion for RNA-seq data with DESeq2. *Genome Biol*. 2014;15(12):550.

776  
777  
778  
779  
780

### 781 **Fig 1. Development of resistance following trickle *T. muris* infection**

782 C57BL/6 mice were infected repeatedly with low doses of *T. muris* infection. A) Total  
783 worm burdens. B) Faecal egg counts of week 11 infected mice. C) Adult and larval  
784 *Trichuris* worm burdens, n=5. D) CD4+ T cell percentage from large intestinal lamina  
785 propria, Th1 (Tbet+), Th2 (GATA3+), Th17 (RORγt+), Tregs (FOXP3+), n=10, from two

786 independent experiments. CD4+ T cell percentage calculated as percentage of all live  
787 cells. T cell subset percentage calculated as percentage of all CD4+ cells. E) Cytokine  
788 production from re-stimulated MLN cells collected at 11 weeks p.i., n=5. Statistical  
789 analysis completed by one way- ANOVA or unpaired t test. Data presented as mean +/-  
790 SEM. \*=p<0.05, \*\*=p<0.01, \*\*\*\*=p< 0.0001. Representative data from 2 independent  
791 experiments.

792

### 793 **Fig 2. Goblet cell responses in *T. muris* trickle infected mice**

794 Caecal sections from trickle infected mice were PAS stained and goblet cells and crypt  
795 length were analyzed. (A) Representative images of PAS stained caecal sections. (B)  
796 Goblet cell counts per crypt. (C) Goblet cell size measured by goblet cell diameter. (D)  
797 Crypt length. (E) Representative images of HID-AB caecal section to visualize  
798 sulphated (black) and sialylated (blue) mucins. n=5, statistical analysis completed by a  
799 one way-ANOVA. Data presented as mean +/- SEM. \*=p<0.05, \*\*=p<0.01, \*\*\*=p<0.001,  
800 \*\*\*\*=p< 0.0001.

801

### 802 **Fig 3: Mucin production in *T. muris* trickle infection**

803 (A) Relative expression of goblet cell secreted products measured by qPCR. (B) Western  
804 blot to visualize Muc5ac protein from extracted mucus from naïve or *T. muris* infected  
805 C57Bl/6 mice at 11 weeks p.i.. (C) Muc2+ goblet cells per crypt and representative  
806 immunostained sections during trickle infection. Muc2 in green. DAPI stain in blue. n=5,  
807 statistical analysis completed by a one way-ANOVA comparing each time point to week  
808 0. Data presented as mean +/- SEM, \*=p<0.05.

809

810 **Fig 4. Epithelial cell turn over following *T. muris* trickle infection**

811 Mice were I.P. injected with BrdU to identify proliferating cells. (A) Caecal sections were  
812 stained for anti-BrdU (green) and DAPI (blue) and the distance the furthest BrdU stained  
813 cell was measured. (B) Quantification of epithelial turnover measured by BrdU  
814 incorporation into proliferating cells. (C) Relative expression of amphiregulin in the  
815 caecum measured by qPCR. n=5, statistical analysis completed by a one way-ANOVA or  
816 unpaired t test. Data presented as mean +/- SEM, \*\*=p<0.01.

817

818 **Fig 5. Challenge infection of *T. muris* trickled mice**

819 To determine whether trickle infection could protect against a challenge infection, trickle  
820 infected mice were either left to expel all worms naturally or were removed by anti-  
821 helminthic treatment. (A) At week 30, when no worms were present, determined by  
822 measuring faecal egg output, mice were challenged with a single low dose infection.  
823 Control mice of a single low dose, single high dose or no primary infection were also  
824 challenged at week 30 post infection n = 10 or greater. (B) Following trickle infection mice  
825 were treated with anti-helminthic to remove final worms at week 11 post infection. Naïve  
826 mice and trickled mice were challenged with a low dose infection one week after anti-  
827 helminthic treatment. n=5 representative of two independent experiments, statistical  
828 analysis completed by a one way ANOVA or an unpaired t test. Data presented as mean  
829 +/- SEM, \*=p<0.05, \*\*=p<0.01, \*\*\*=p<0.001, \*\*\*\*=p< 0.0001.

830

831 **Fig 6. CD4+ depletion in *T. muris* trickle infection**

832 (A) Worm burdens of *T. muris* trickle infected Rag<sup>-/-</sup> (black) and C57Bl/6 (grey) mice, n=5.  
833 Adult worms and larval stages 4-2 were counted. Mice were treated with 200µg anti-CD4  
834 antibody or isotype control antibody, 3 times a week for 3 weeks (weeks 8-10 of trickle  
835 infection). (B) FACS analysis of CD4<sup>+</sup> T cells to confirm depletion. (C) Total worm  
836 burdens of *T. muris* infected mice at week 11. (D) Adult worms and larval stage counts  
837 following CD4<sup>+</sup> depletion at week 11 trickle infection, n=9-10, based on two experiments.  
838 Statistical analysis completed using an unpaired t test. Data presented as mean +/- SEM,  
839 \*=p<0.05, \*\*=p<0.01, \*\*\*=p<0.001, \*\*\*\*=p< 0.0001.

840

841 **Fig 7. Changes in worm expulsion mechanisms following CD4<sup>+</sup> T cell depletion in**  
842 **trickle infection.**

843 Following CD4<sup>+</sup> T cell depletion worm expulsion mechanism were analyzed. (A)  
844 Representative images of PAS stained caecal sections to measure crypt length and  
845 goblet cell counts per crypt, n=5. (B) Relative expression of Muc5ac and RELM-beta  
846 analyzed by qPCR, n=5. (C) Epithelial cell turn over measured by furthest distanced BrdU  
847 stained cells travelled up intestinal crypt. Sections stained by anti-BrdU (green) and DAPI  
848 (blue), n=4-5. Statistics measured using an unpaired t test. Data presented as mean +/-  
849 SEM, \*=p<0.05, \*\*=p<0.01.

850

851 **Fig 8. Innate lymphoid cells and tuft cell proliferation in *T.muris* trickle infection.**

852 (A) Innate lymphoid cell percentage measured by FACS, identified as lineage negative,  
853 CD90.2<sup>+</sup>, CD127<sup>+</sup>. (B) Tuft cells in caecal and small intestine sections of trickle infected



854 mice. Tuft cells identified as DclK1 positive cells in green. DAPI stain in blue. n=5,  
855 statistical analysis completed by a one way-ANOVA, \*=p<0.05.

856

857 **Fig 9. Depletion of ILC2s in ICOS-T mice during *T. muris* trickle infection.**

858 ILC2s were depleted from ICOS-T mice by DTx treatment. (A) Mice received 750ng DTx  
859 (red arrow) for 10 days at week 8-10 of trickle infection (purple arrow) where mice were  
860 infected weekly for 9 weeks with 20 eggs. Control mice received PBS control injections  
861 at the same time points. Two weeks following the final trickle infection worm burdens and  
862 ILC2 depletion was analyzed. (B) Flow cytometry to confirm depletion, ILC2s identified as  
863 Lineage-, CD127+, CD90.2+, GATA3+ cells. ILC2% of all ILCs and ILC2 counts. (C) Total  
864 worm burdens of trickle infected mice. (D) Worm burdens of developmental stages during  
865 trickle infection. Statistical analysis completed by an unpaired t-test. Data presented as  
866 mean +/- SEM, \*=p<0.05. n=6-7 representative of two experiments.

867

868 **Fig 10. NMDS analysis of fecal microbial communities during low dose and trickle**  
869 ***T. muris* infection.**

870 (A) NMDS plot of microbial communities during *T. muris* Low Dose infection. Naïve mice  
871 (blue) were compared to mice trickled with *T. muris* (purple) at 9 and 11 weeks post  
872 infection (○ & □). Infection and time drove significant changes in microbiome composition  
873 (p = 0.001 & p = 0.05) assessed by PERMANOVA. (B) NMDS plot of microbial  
874 communities during *T. muris* trickle infection. Naïve mice (blue) were compared to mice  
875 trickled with *T. muris* (red) at 9 and 11 weeks post infection (○ & □). Infection drove a

876 significant change in microbiome composition ( $p < 0.004$ ) assessed by PERMANOVA.  
877 Axes represent a scale of Euclidian distances between samples where the centre is zero.  
878 Stress measures quality of fit ( $< 0.1$  indicates a very good fit). (C & D) Alpha diversity of  
879 (C) low dose and (D) trickle infected mice given calculated in R by Shannon diversity test  
880 using the Vegan package. Significance is calculated by two-way ANOVA. Data presented  
881 as mean, \* =  $p < 0.05$ , \*\* =  $p < 0.01$ , \*\*\*\* =  $p < 0.0001$ .

882

883 **Fig 11. Comparative abundance of bacterial genera in naïve and trickled mice.**

884 Bubble plot representing the relative abundance of the top 20 genera determined as those  
885 with the highest median abundance across all individuals (as a proportion of total  
886 microbial composition). Circle size is representative of the proportion of the microbiota  
887 comprised by that genus. Empty spaces indicate that there was no detection of that genus  
888 by 16S sequencing.

889

890 **Supplementary Fig 1. *T. muris* trickle infection regime.**

891 C57BL/6 mice were infected weekly with low doses of *T. muris* (20 eggs) for 3, 5, 7 or 9  
892 weeks (red arrow). 2 weeks after the final infectious dose at week 5, 7, 9 and 11, worm  
893 burdens and immune responses were analysed (black box).

894

895 **Supplementary Fig 2. CD4+ T cells in MLN following *T. muris* trickle infection.**

896 C57BL/6 mice were infected weekly with low doses of *T. muris* and 2 weeks after the  
897 final trickle infection CD4+ T cells were analyzed by FACs. CD4+ Th1 (Tbet+), Th2  
898 (GATA3+), Th17 (ROR $\gamma$ t+), Tregs (FOXP3+), n=10, from two independent experiments.

899 CD4+ T cell percentage calculated as percentage of all live cells. T cell subset percentage  
900 calculated as percentage of all CD4+ cells.

901

902 **Supplementary Fig 3. *T. muris* specific antibody responses in trickle infected mice.**

903 Antibody responses measured from sera collected from trickle infected mice, measured  
904 by an ELISA. The antibody response specific for adult worms and larval stages 1-4 was  
905 measured. (A) IgG1 response. (B) IgG2a/c response. (C) Total IgE response. n=5,  
906 statistical analysis completed by a one way-ANOVA. Data presented as mean +/- SEM,  
907 \*=p<0.05, \*\*=p<0.01, \*\*\*\*=p< 0.0001.

908

909 **Supplementary Fig 4. *T. muris* specific antibody responses following CD4+ T cell  
910 depletion.**

911 Sera from *T. muris* infected mice depleted of CD4+ T cells was collected and IgG1 and  
912 IgG2a responses specific for *T. muris* larval stages was measured by an ELISA. A)  
913 IgG1 response to adult worms and larval stages 1-4. B) IgG2a response to adult worms  
914 and larval stages 1-4. Isotype control in grey. Anti-CD4 treatment mice in black. n=5  
915

916 **Supplementary Fig 5. ILCs counts in MLN.**

917 Innate lymphoid cell counts and percentage in the MLN following *T. muris* trickle infection  
918 measured by FACS, identified as lineage negative, CD90.2+, CD127+. Total ILC  
919 percentage calculated as percentage of all live cells. ILC subset calculated as the  
920 percentage of total ILCs. n=3, statistical analysis completed by a one way-ANOVA. Data  
921 presented as mean +/- SEM, \*=p<0.05, \*\*=p<0.01

922

923 **Supplementary Fig 6. Depletion of ILC2s in ICOS-T mice.**

924 ILC2s were depleted from ICOS-T mice by DTx treatment. (A) Mice received 750ng DTx  
925 (red arrow) for 5 days before *T. muris* high dose (400 eggs) infection (purple arrow) and  
926 1 week after *T. muris* infection for 5 days. Control mice received PBS control injections at  
927 the same time points. Worm burden was analysed at week 5 p.i. (black arrow) (B) Flow  
928 cytometry to confirm depletion, ILC2s identified as Lineage-, CD127+, CD90.2+, GATA3+  
929 cells. ILC2% of all ILCs and ILC2 counts. (C) Worm burden of *T. muris* at day 35 p.i.  
930 Statistical analysis completed by an unpaired t-test. . Data presented as mean +/- SEM,  
931 \*=p<0.05. n=3-5.

932

933 **Supplementary Fig 7. Immediate hypersensitivity response to OVA antigen during**  
934 ***Trichuris muris* infection.**

935 C57BL/6 mice were infected with a single low dose or trickled with *T. muris* over 9 weeks.  
936 At week 8 following the first infection mice were sensitized with 50 µg OVA antigen in 2mg  
937 of Alum or PBS control for 3 weeks. 4 weeks following the final sensitization all mice were  
938 challenged with 50 µg OVA by intradermal injection in the right ear and a PBS control  
939 injection in the left ear. A) Timeline of *T. muris* infection and sensitisation and challenge  
940 of OVA/PBS. B) Immediate hypersensitivity response in mice following PBS and OVA  
941 challenge. C) Immediate hypersensitivity in *T. muris* infected mice sensitised with OVA  
942 antigen. D) Worm burdens of *T. muris* trickle infected mice. Data presented as mean +/-

943 SEM. Statistical test calculated by an unpaired t-test, \*\*= $p < 0.01$ , \*\*\*= $p < 0.001$ , \*\*\*\*= $p <$   
944  $0.0001$ ,  $n=5$ .

945

946 **Supplementary Fig 8. Co-infection of *Trichuris muris* with *Nippostrongylus***  
947 ***brasiliensis*.**

948 C57BL/6 mice were infected with a single *T. muris* low dose (20 eggs) or trickle infected  
949 of 9 weekly low doses by oral gavage. At week 10, *T. muris* infected mice and naive mice  
950 were infected with a single high dose (300 larvae) of *N. brasiliensis* by subcutaneous  
951 injection. At day 3 and day 6 following the *N. brasiliensis* infection, worm burdens of *N.*  
952 *brasiliensis* from the lung and small intestine and *T. muris* in the caecum, were counted.

953 A) Timeline of infection regime. B) Worm burdens of *N. brasiliensis* in the small intestine  
954 and lung. C) *T. muris* worm burdens from low dose infected and trickle infected mice.  
955 Burdens of total worms and well as adult, L4, L3 and L2 were counted for trickle infected  
956 mice. Data presented as mean +/- SEM. Statistical analysis was carried out using a one-  
957 way ANOVA followed by post-hoc Tukey's test.  $n=5$ .

958

959 **Supplementary Fig 9. Composition of microbial communities during infection.**

960 (A) Rarefaction curves for individual samples calculated in R using the vegan package.

961 (B) Phylum level comparisons between samples. Phyla representing, on average, less  
962 than 2% of the population were grouped into "other."

963

**A**

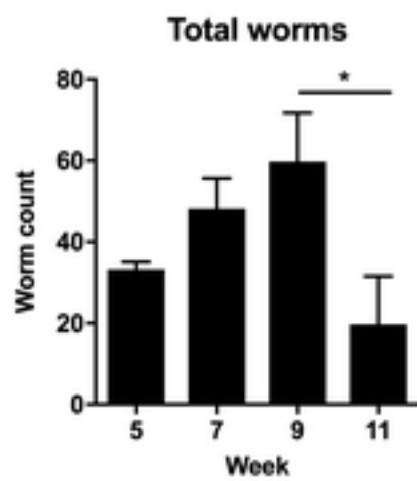

**B**

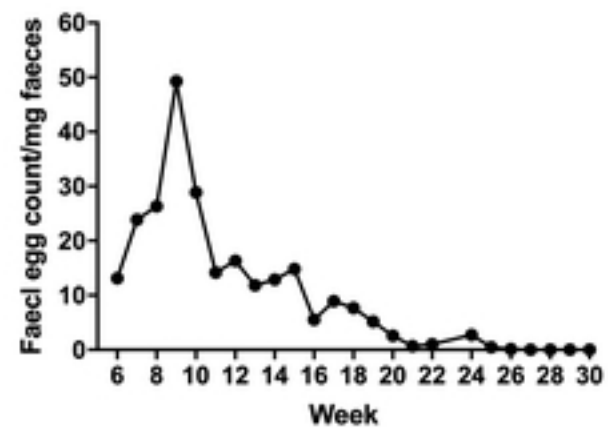

**C**

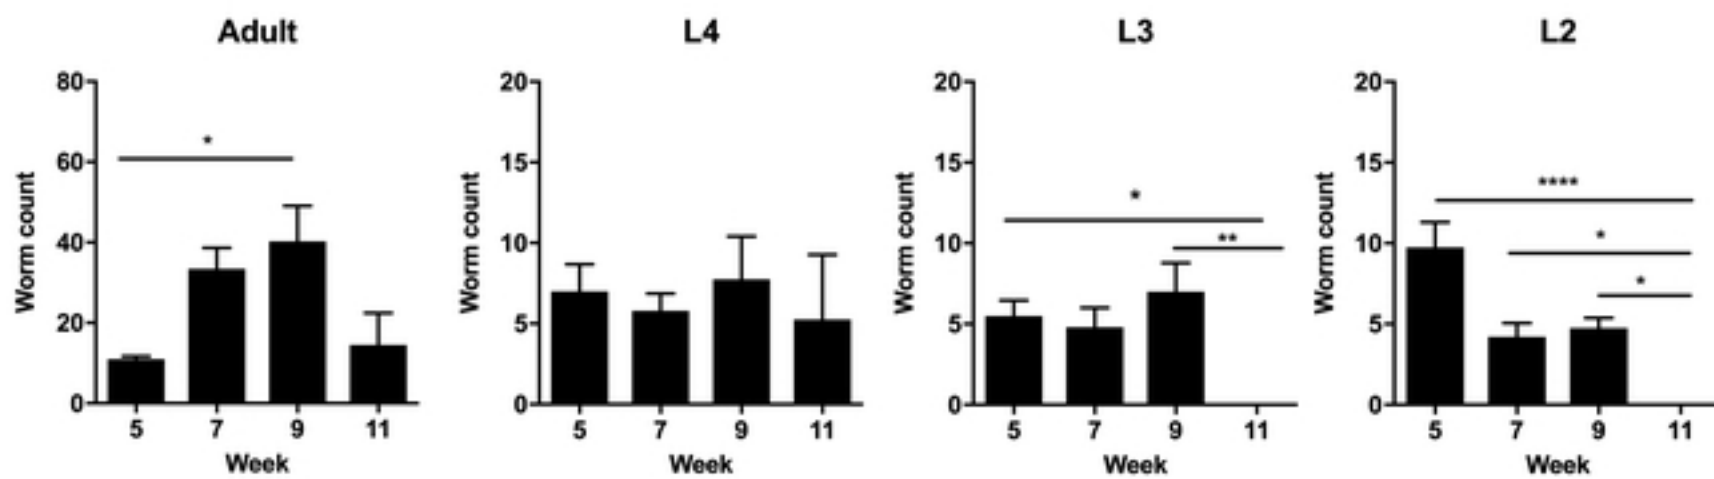

**D**

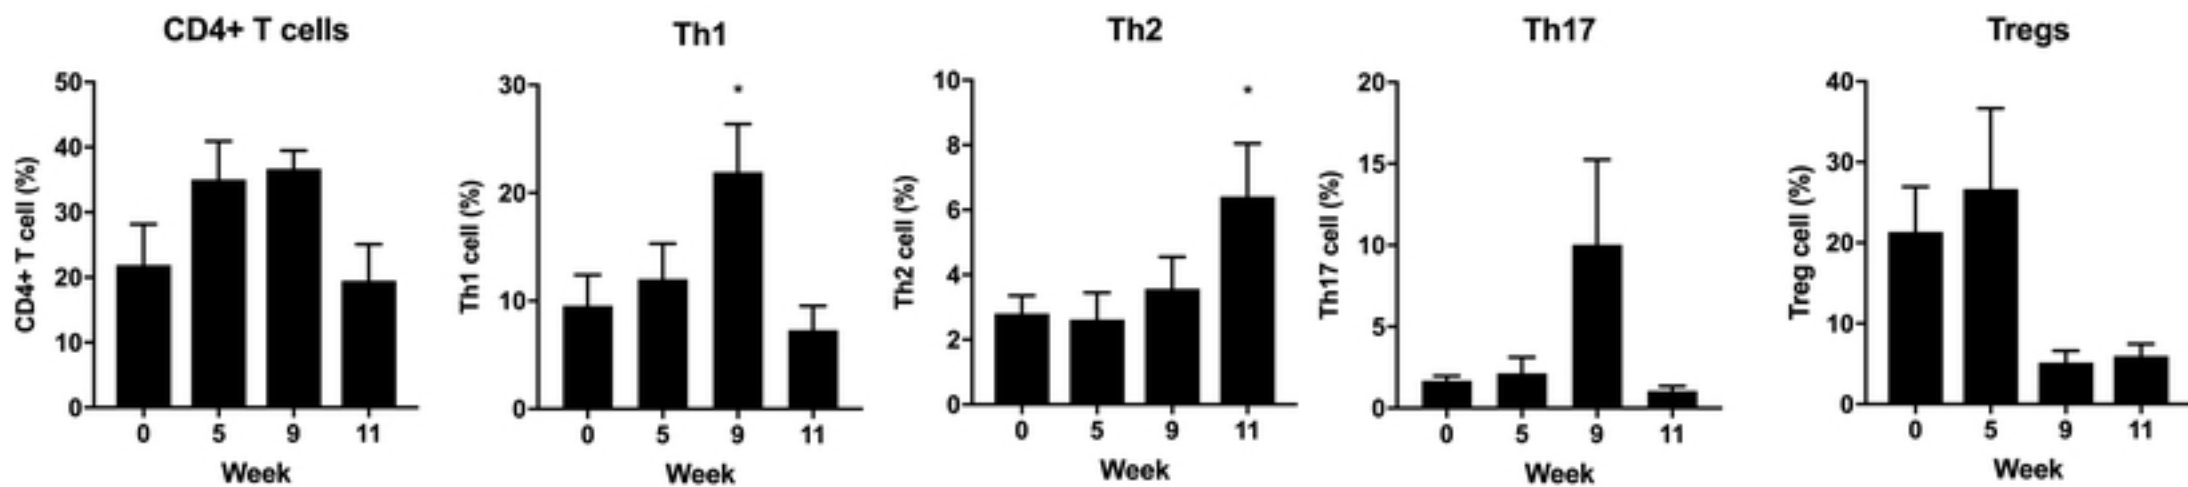

**E**

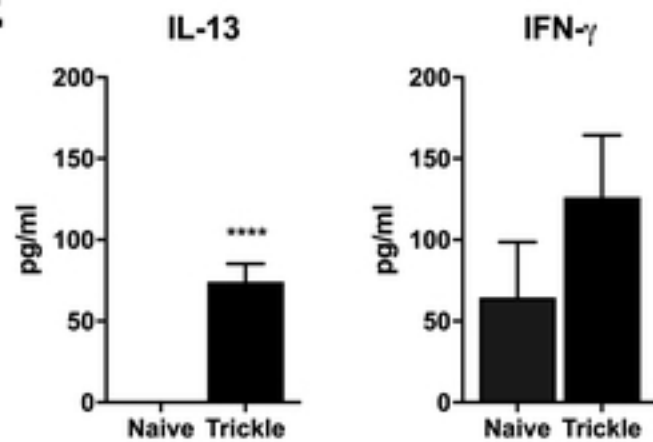

**A**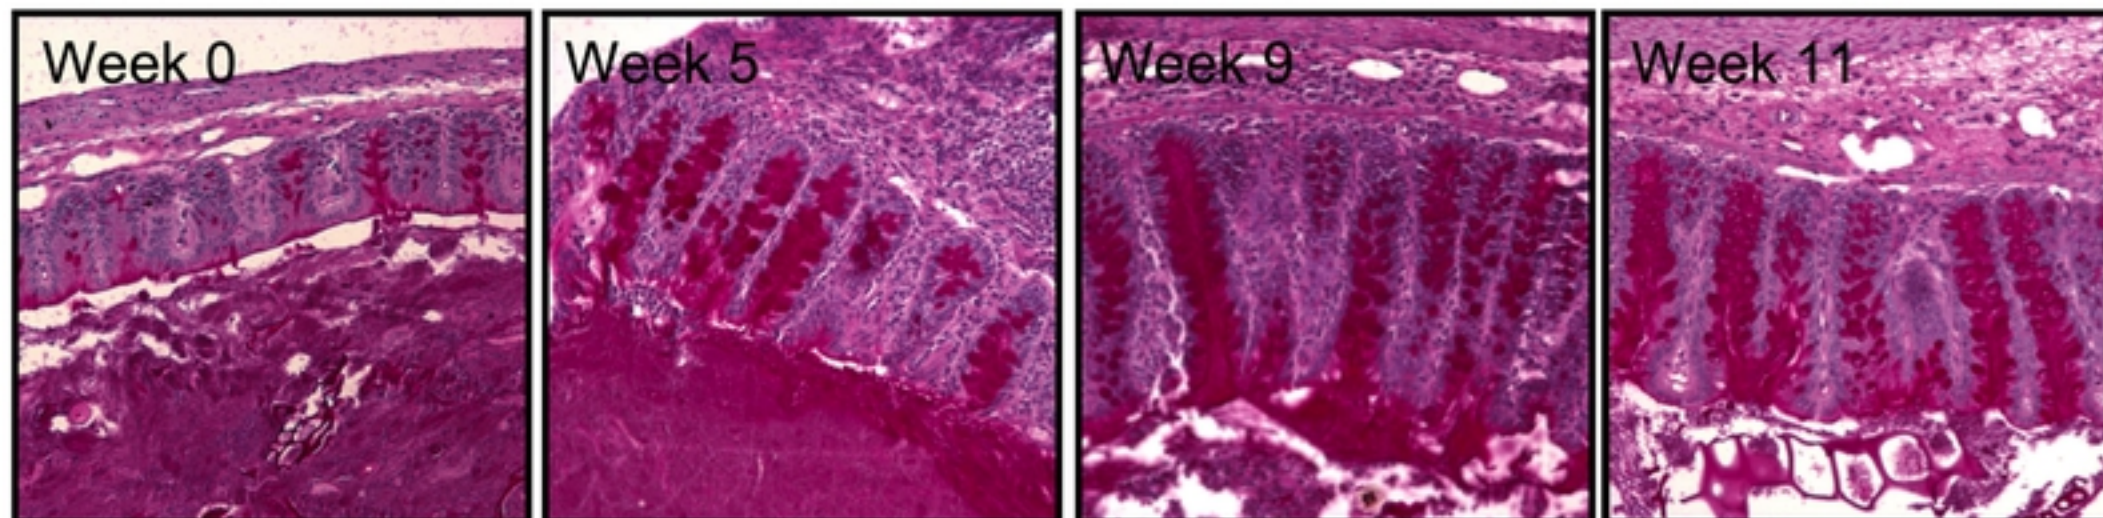**B**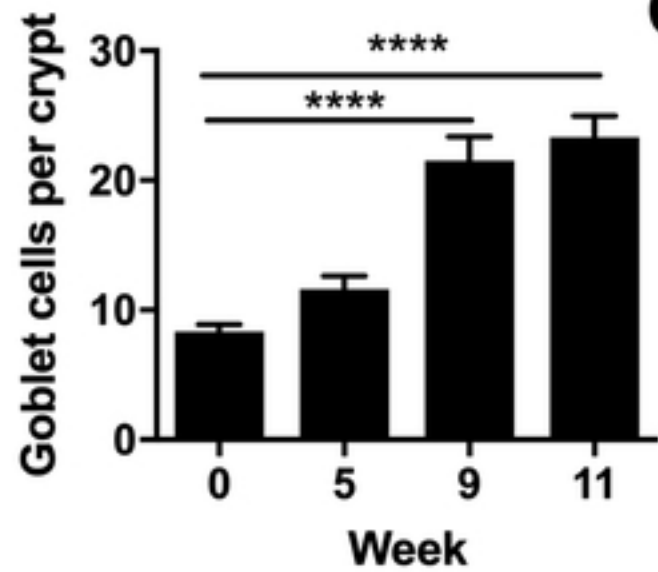**C**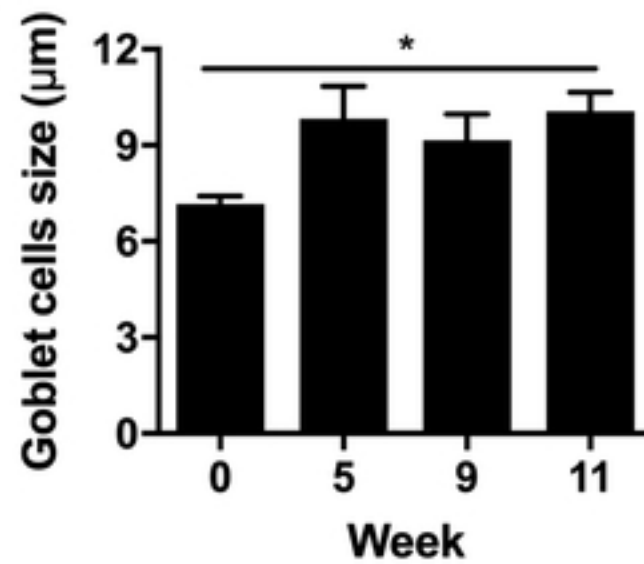**D**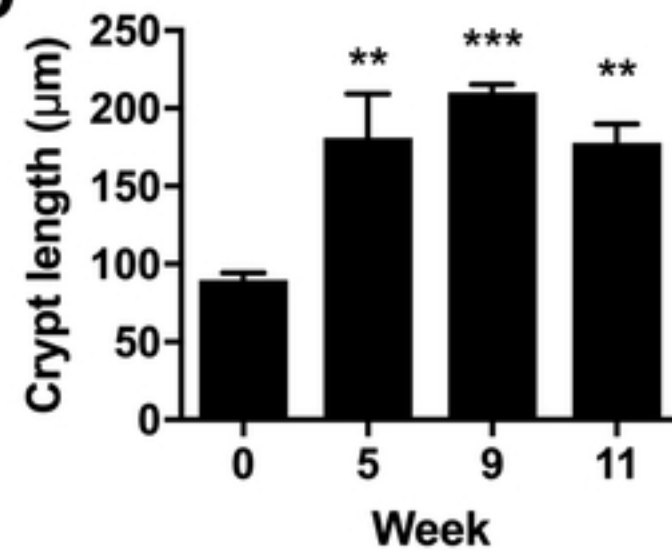**E**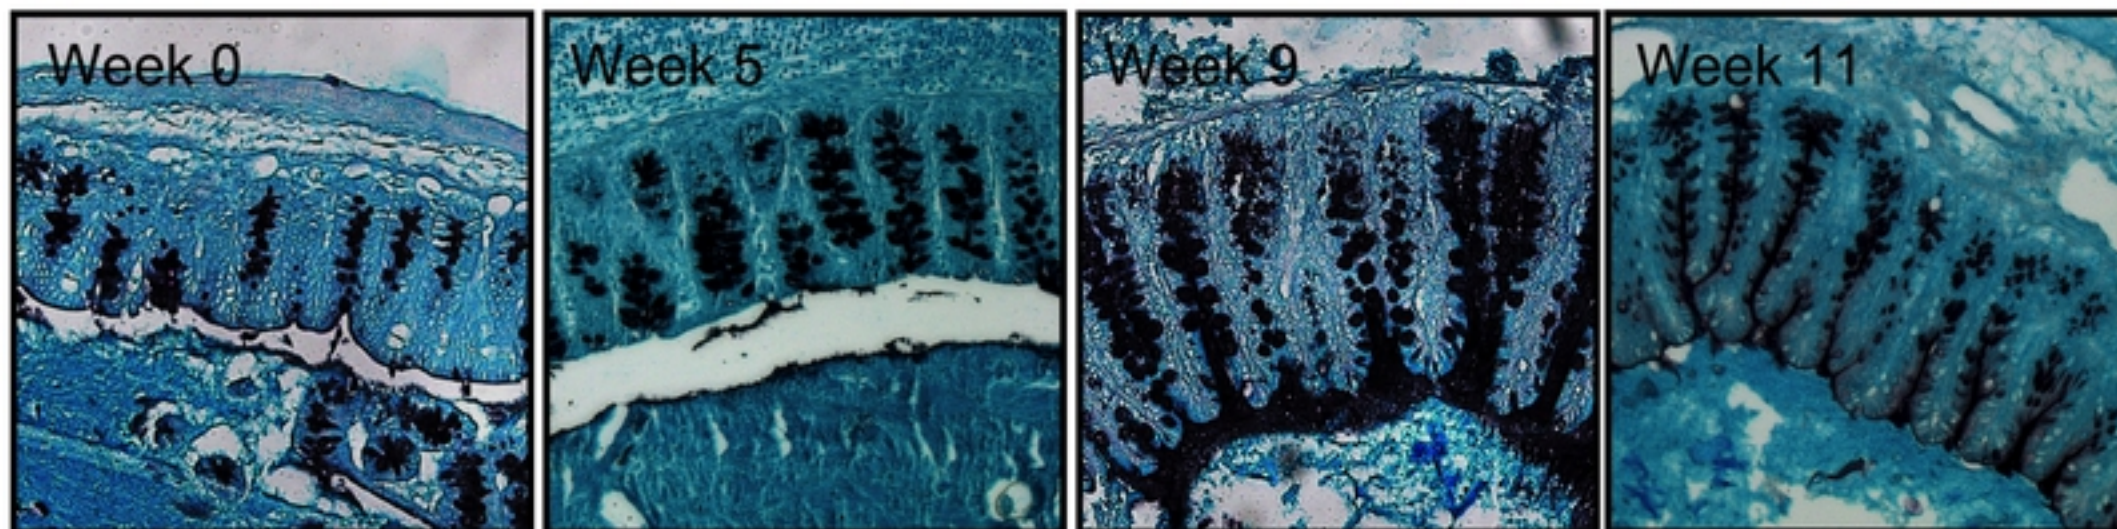

**A**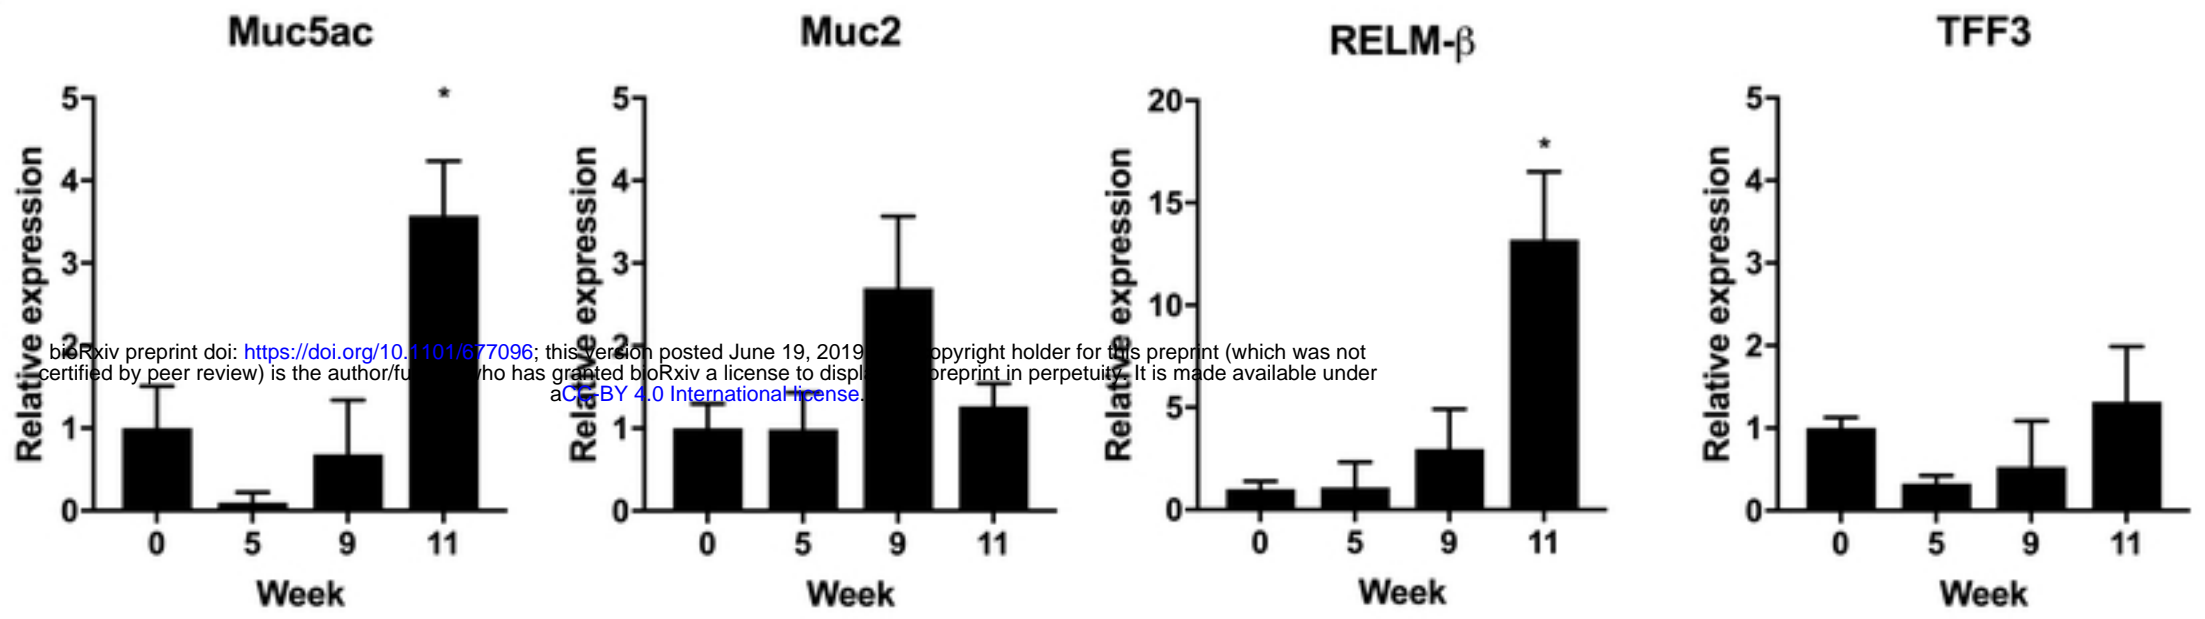**B**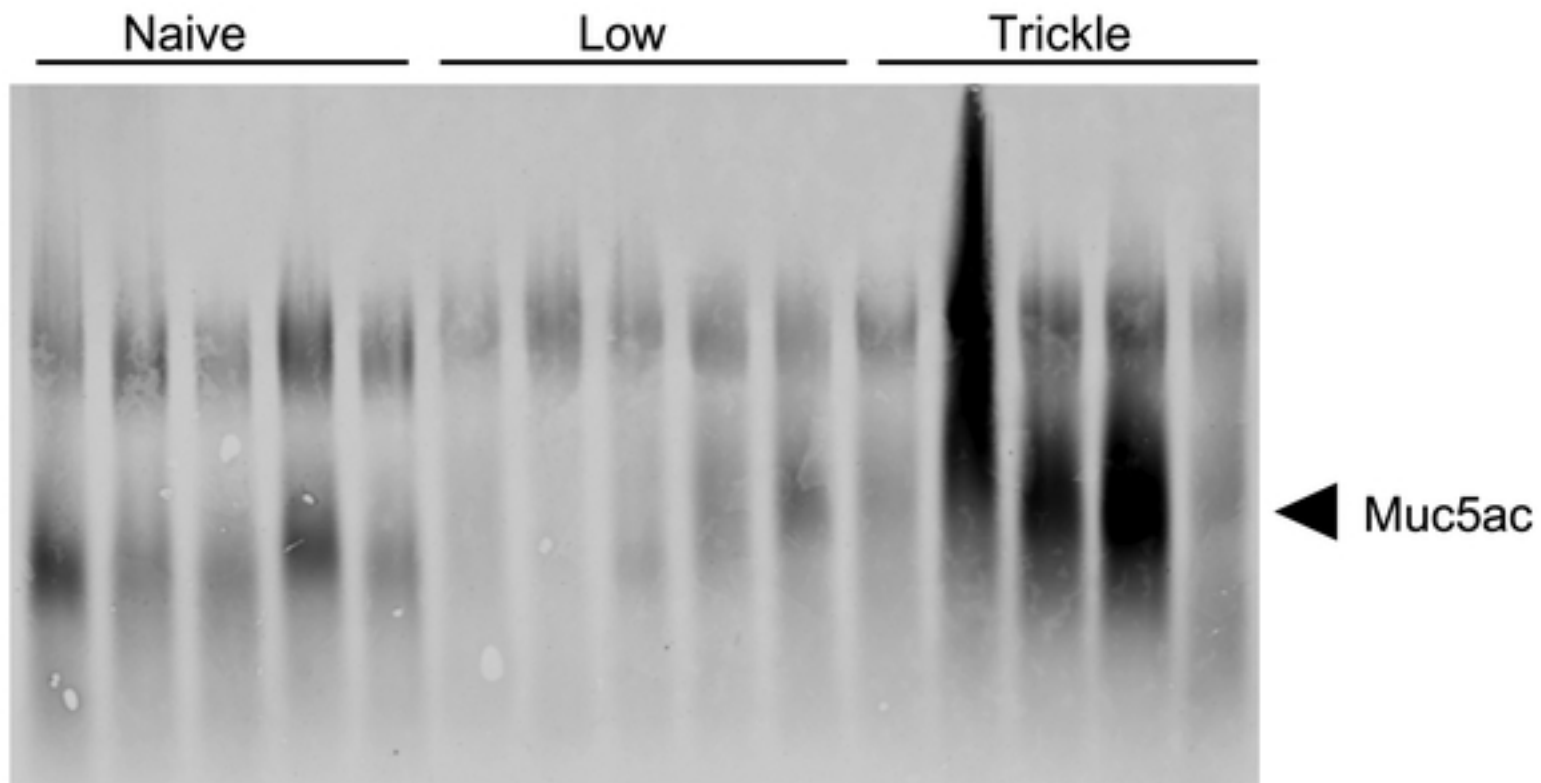**C**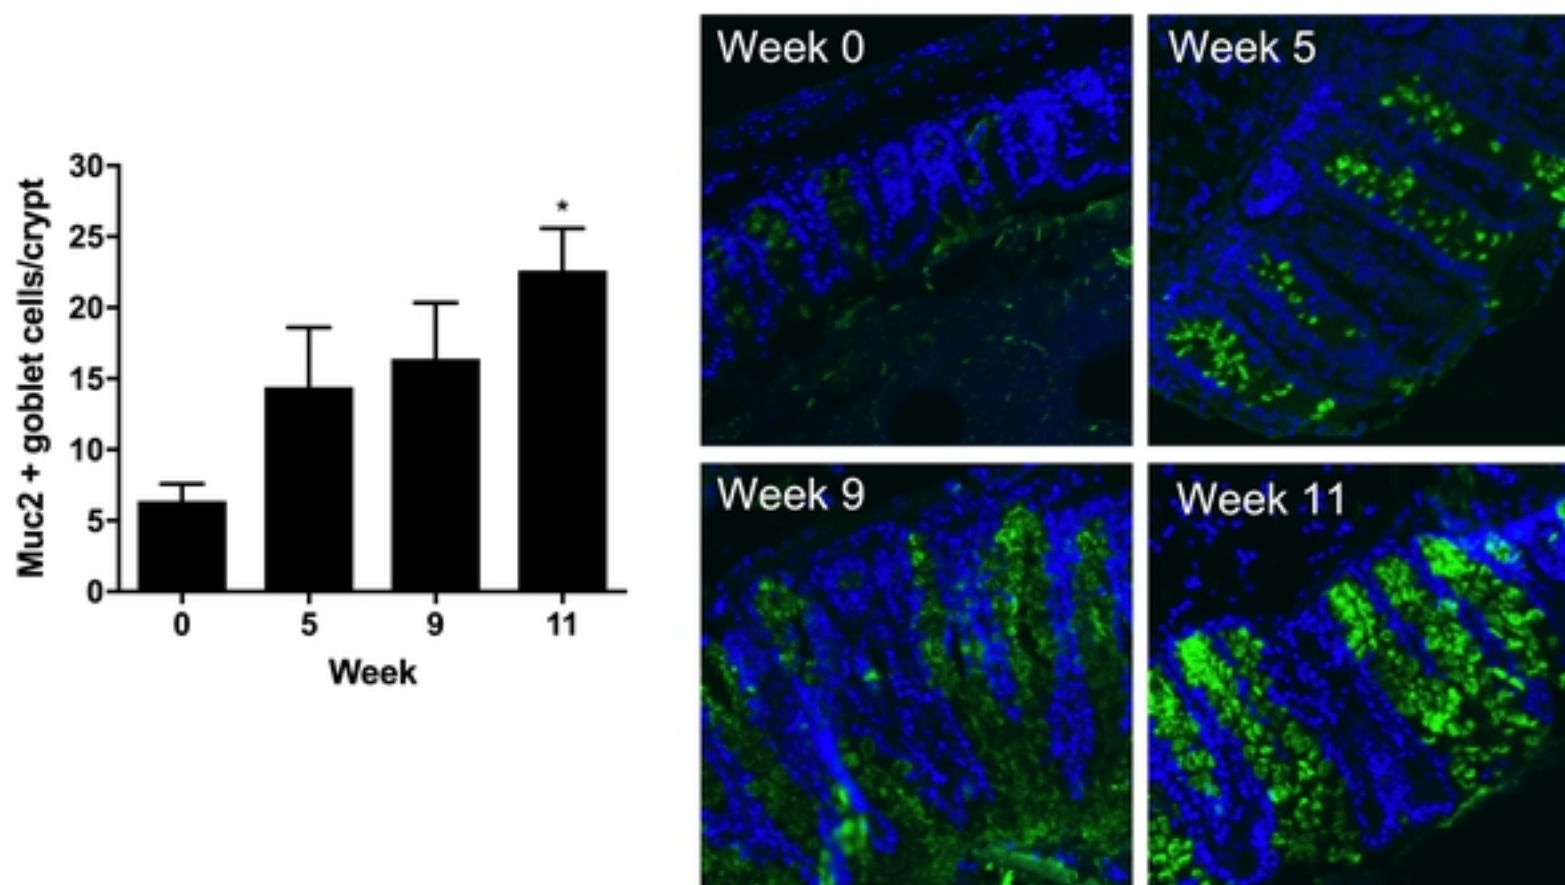



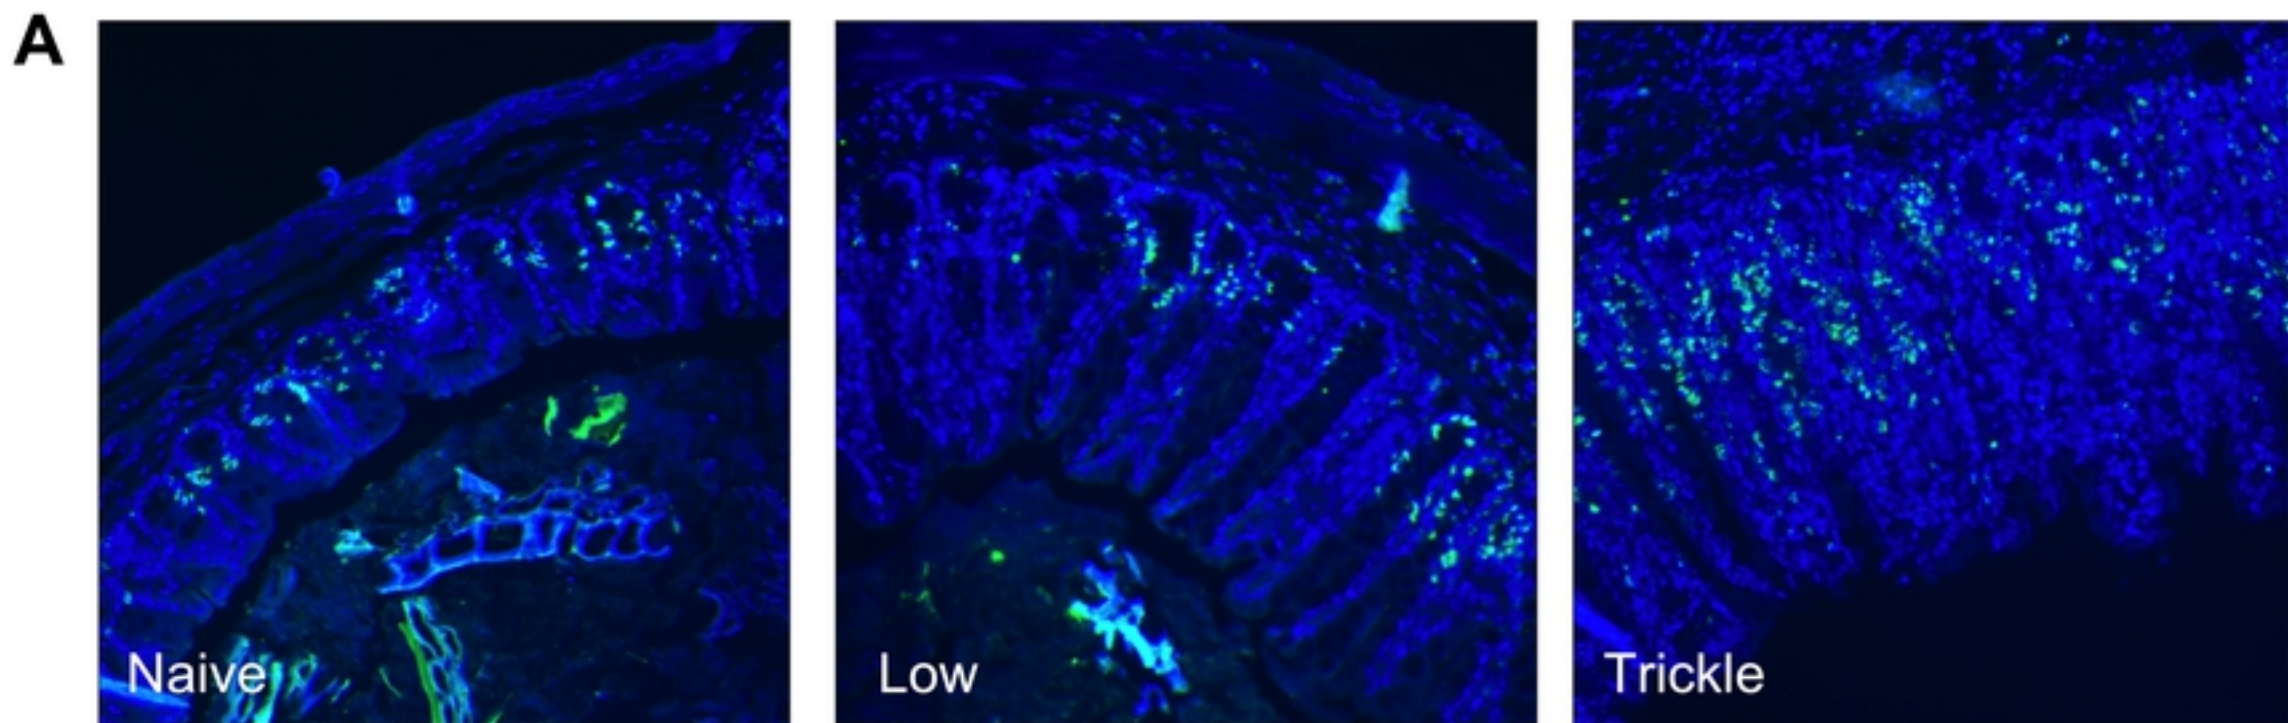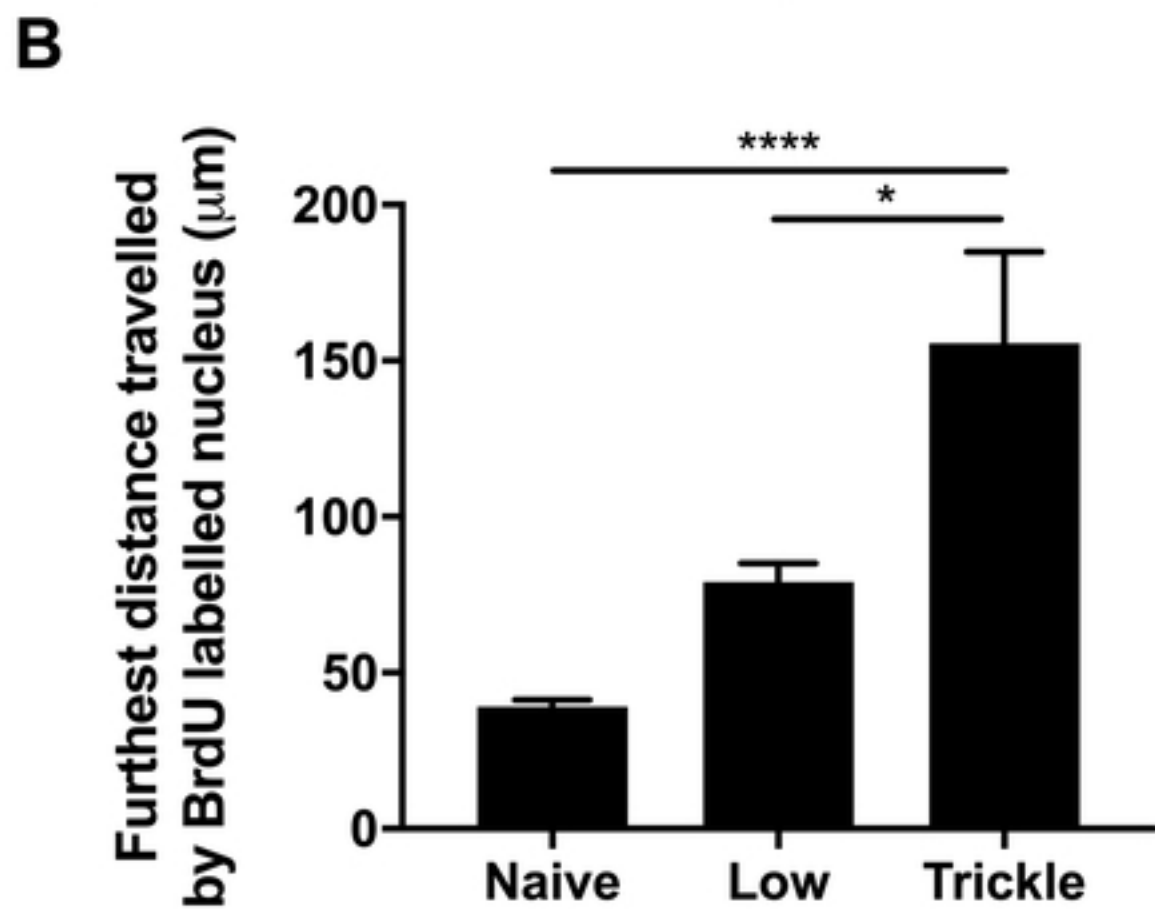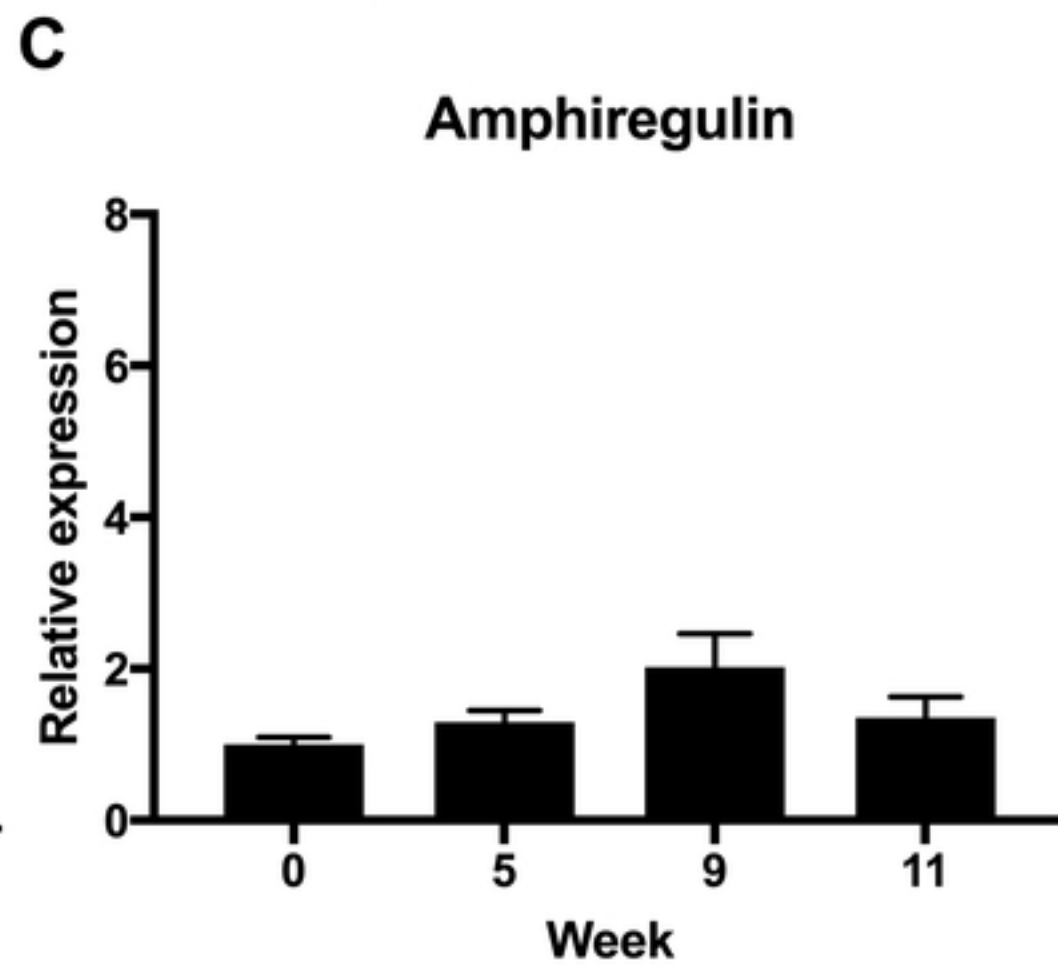

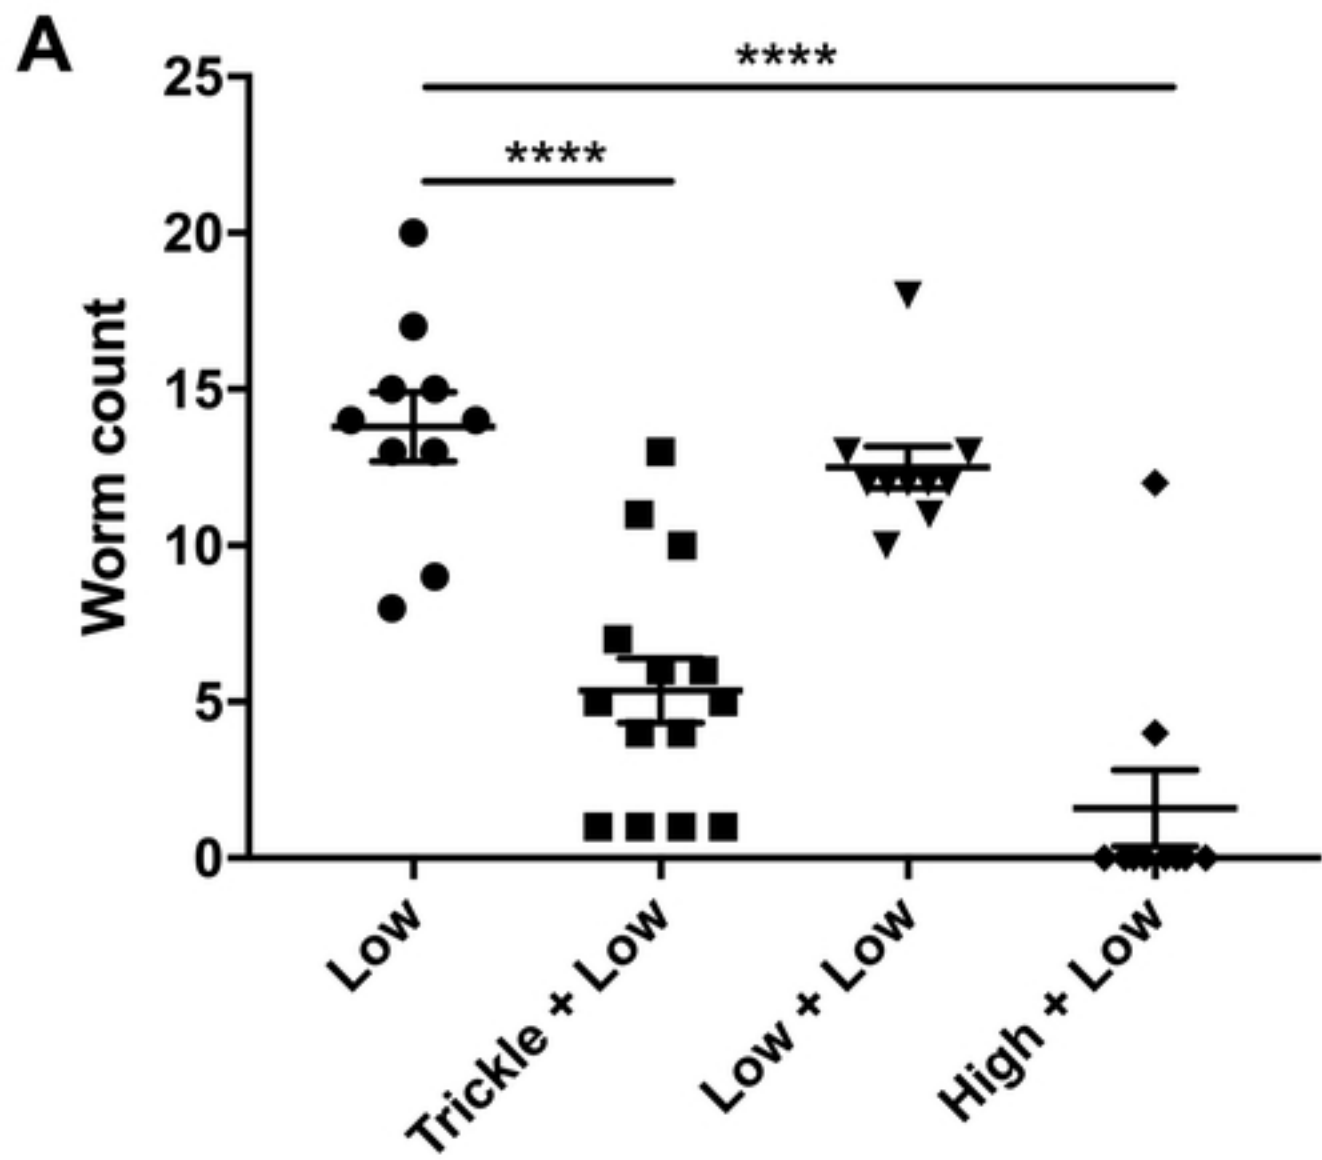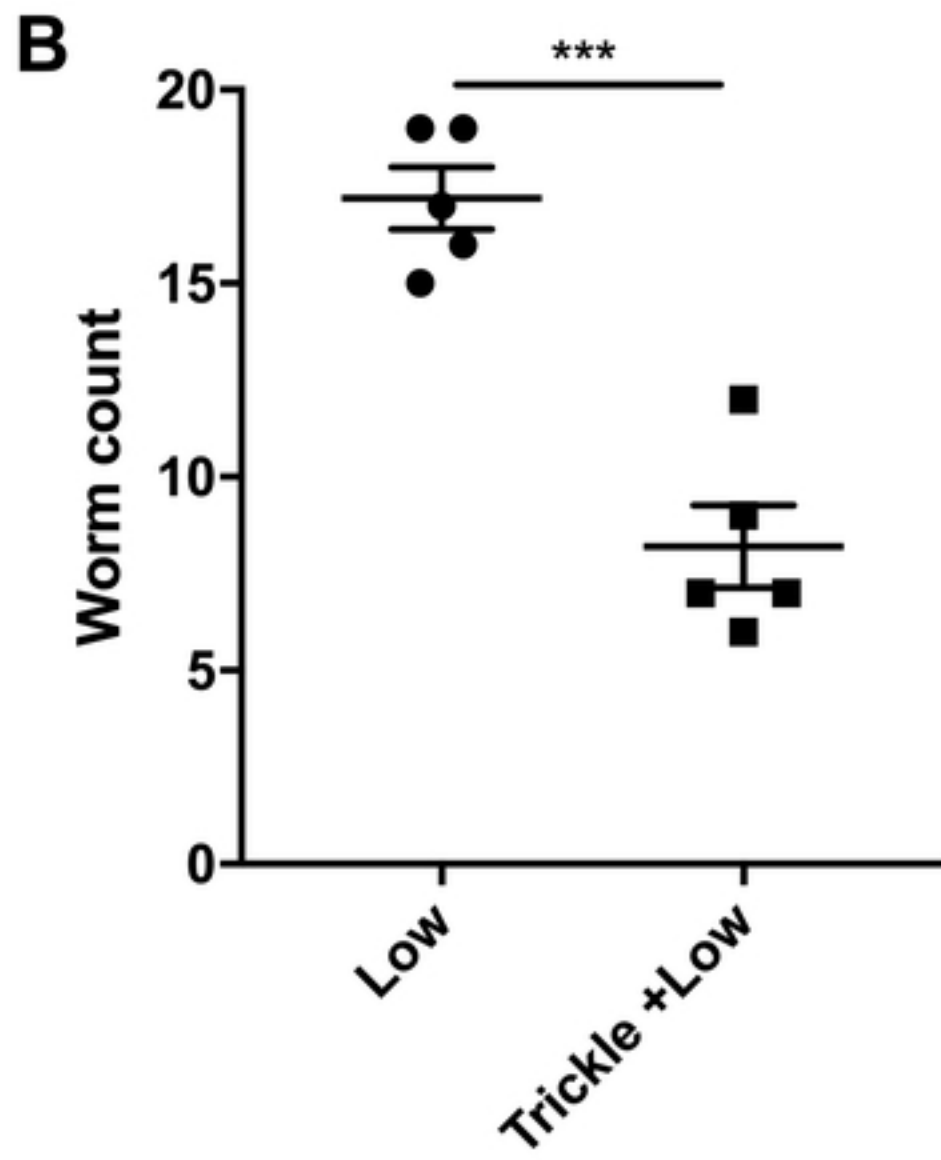

**A**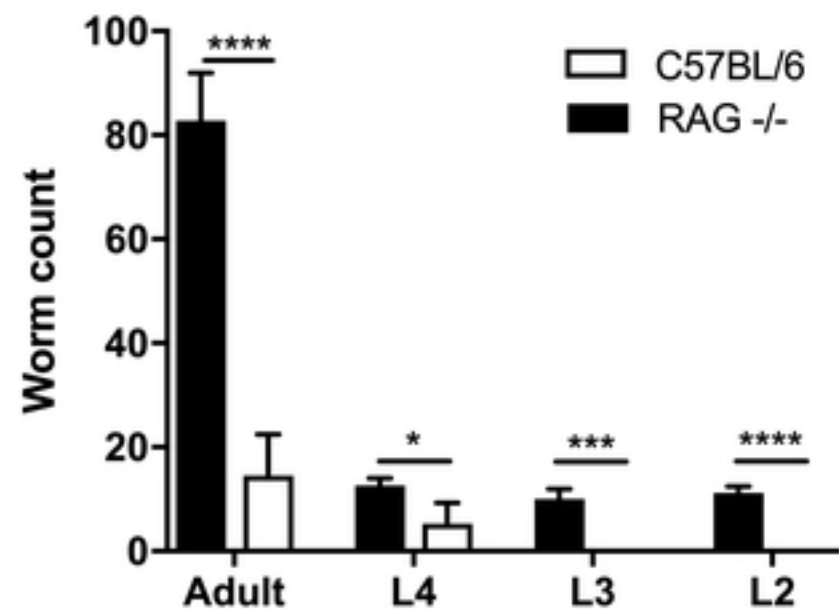**B**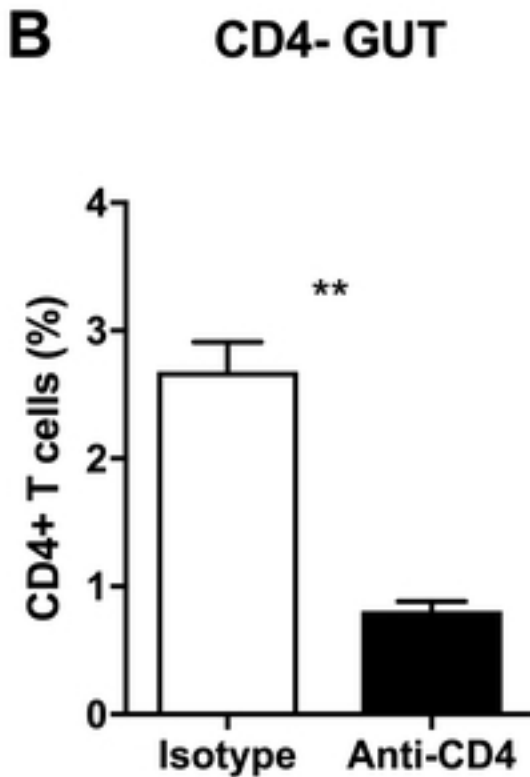**C**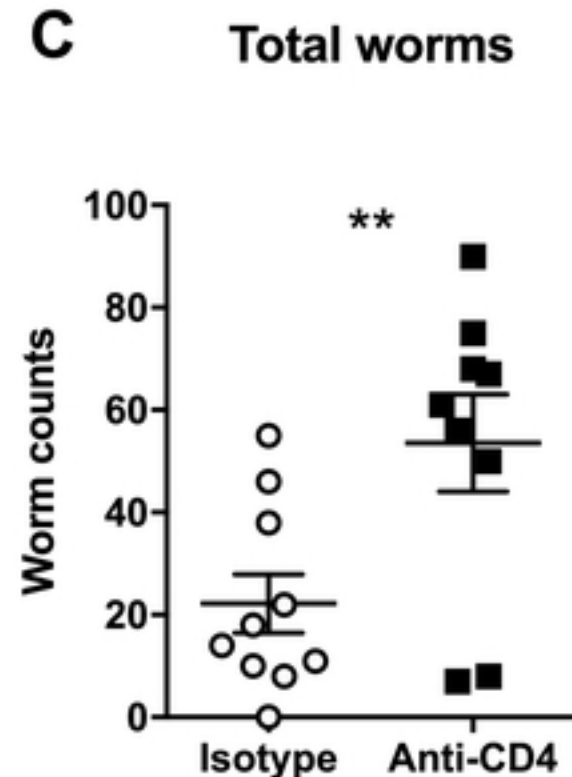**D**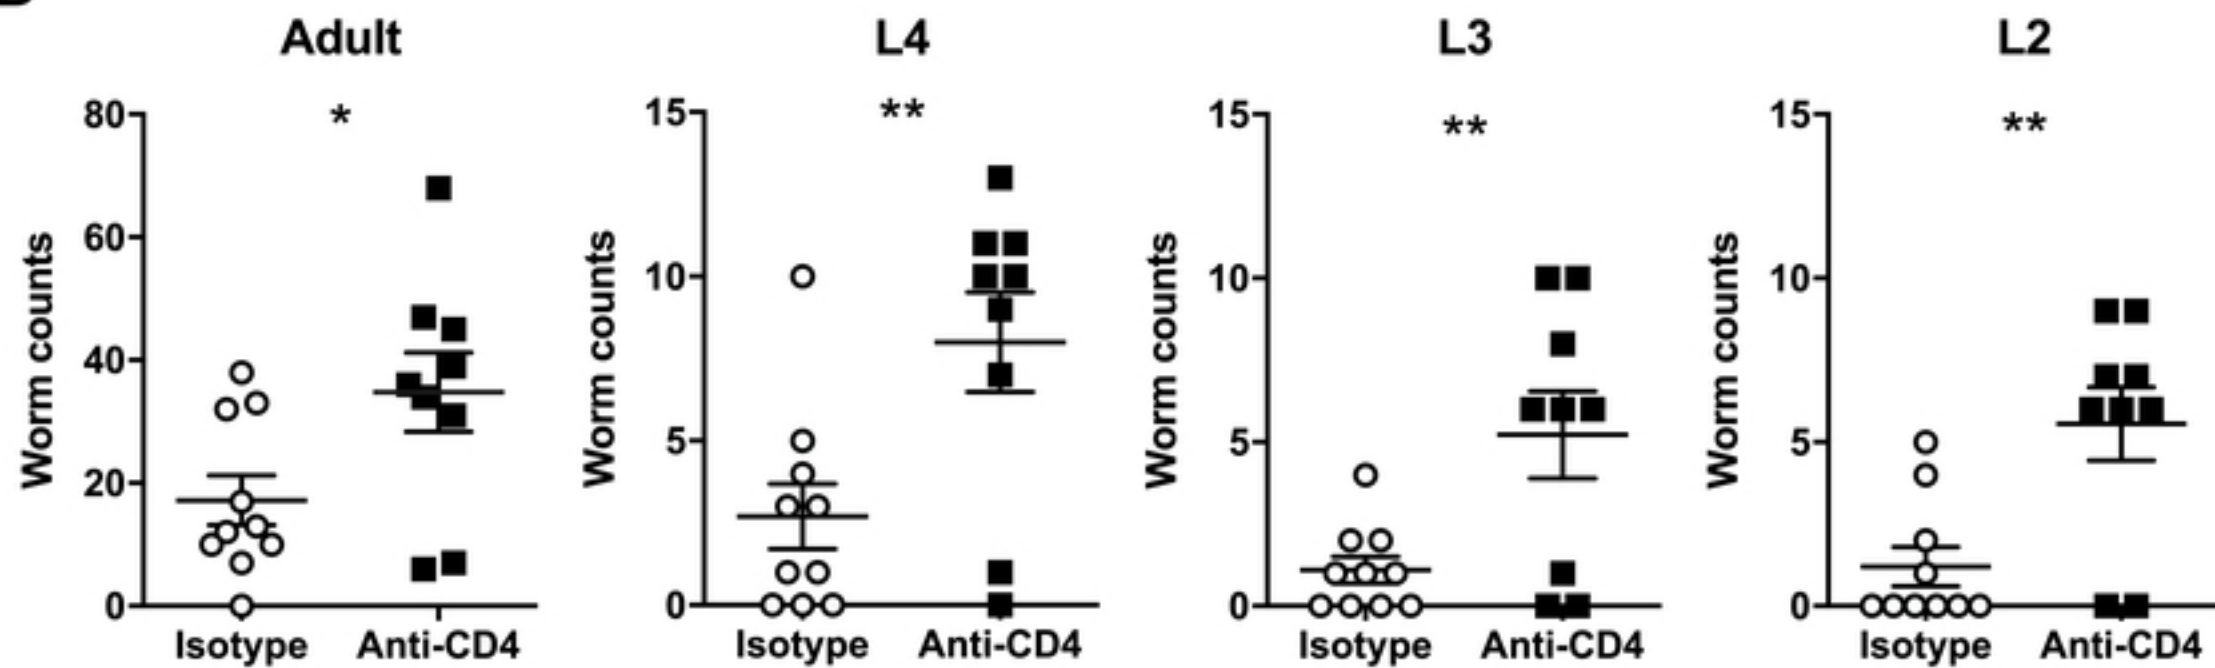

**A**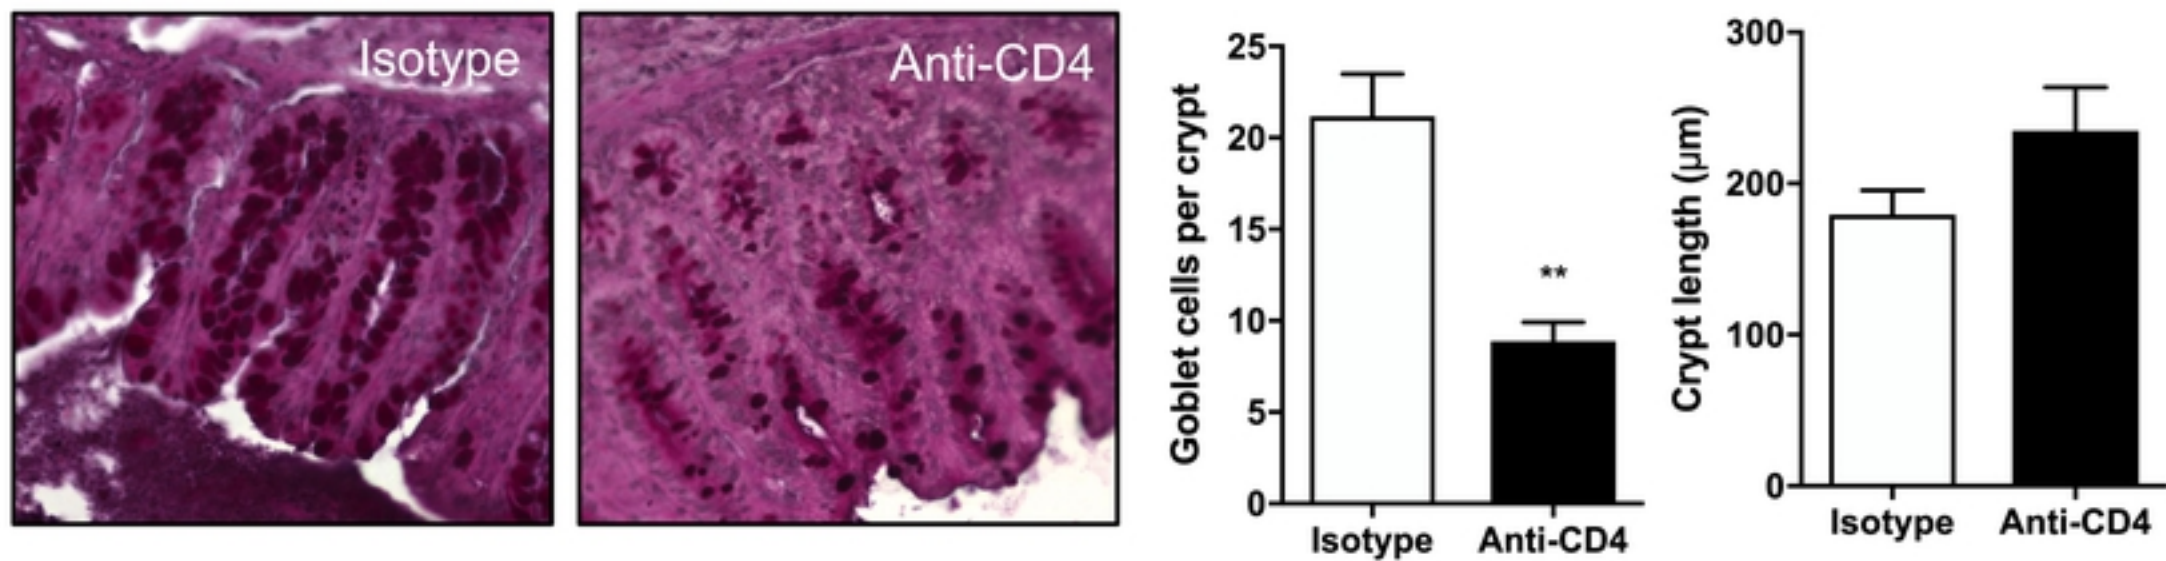**B**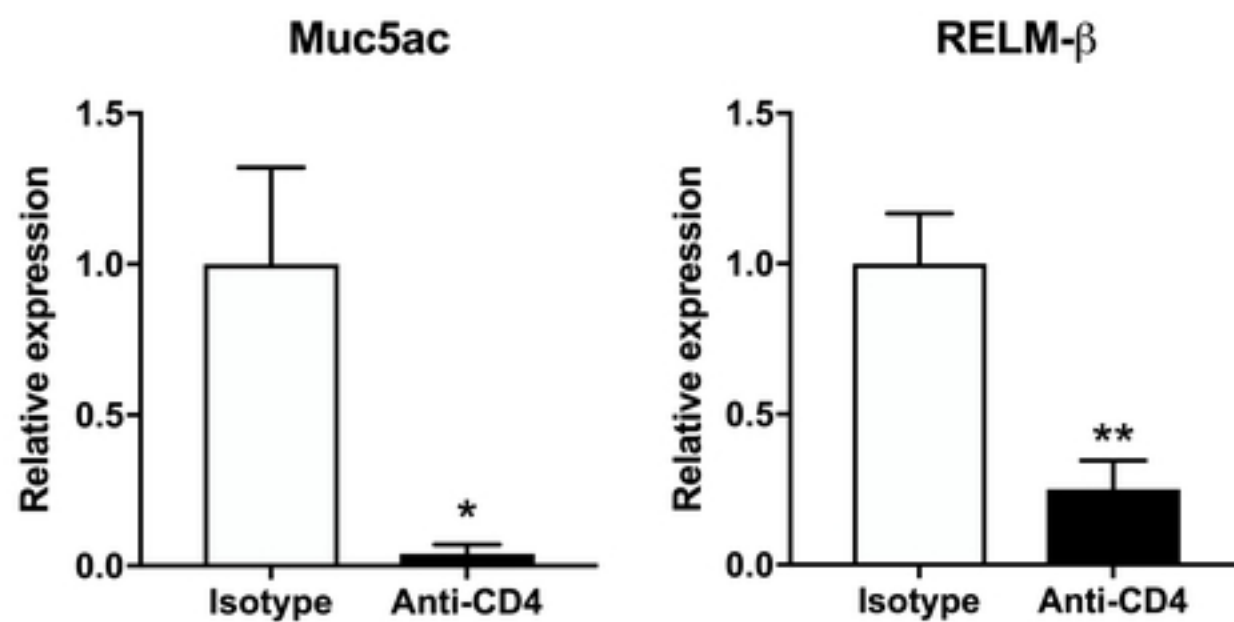**C**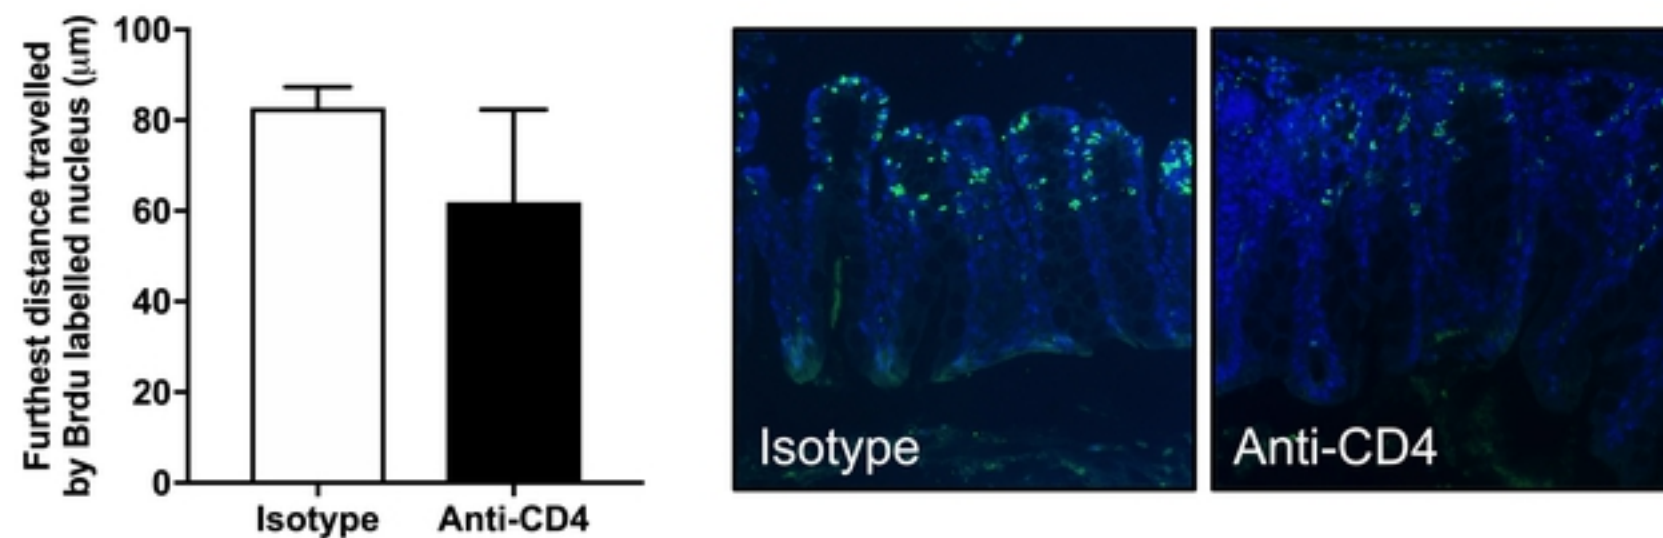

**A**

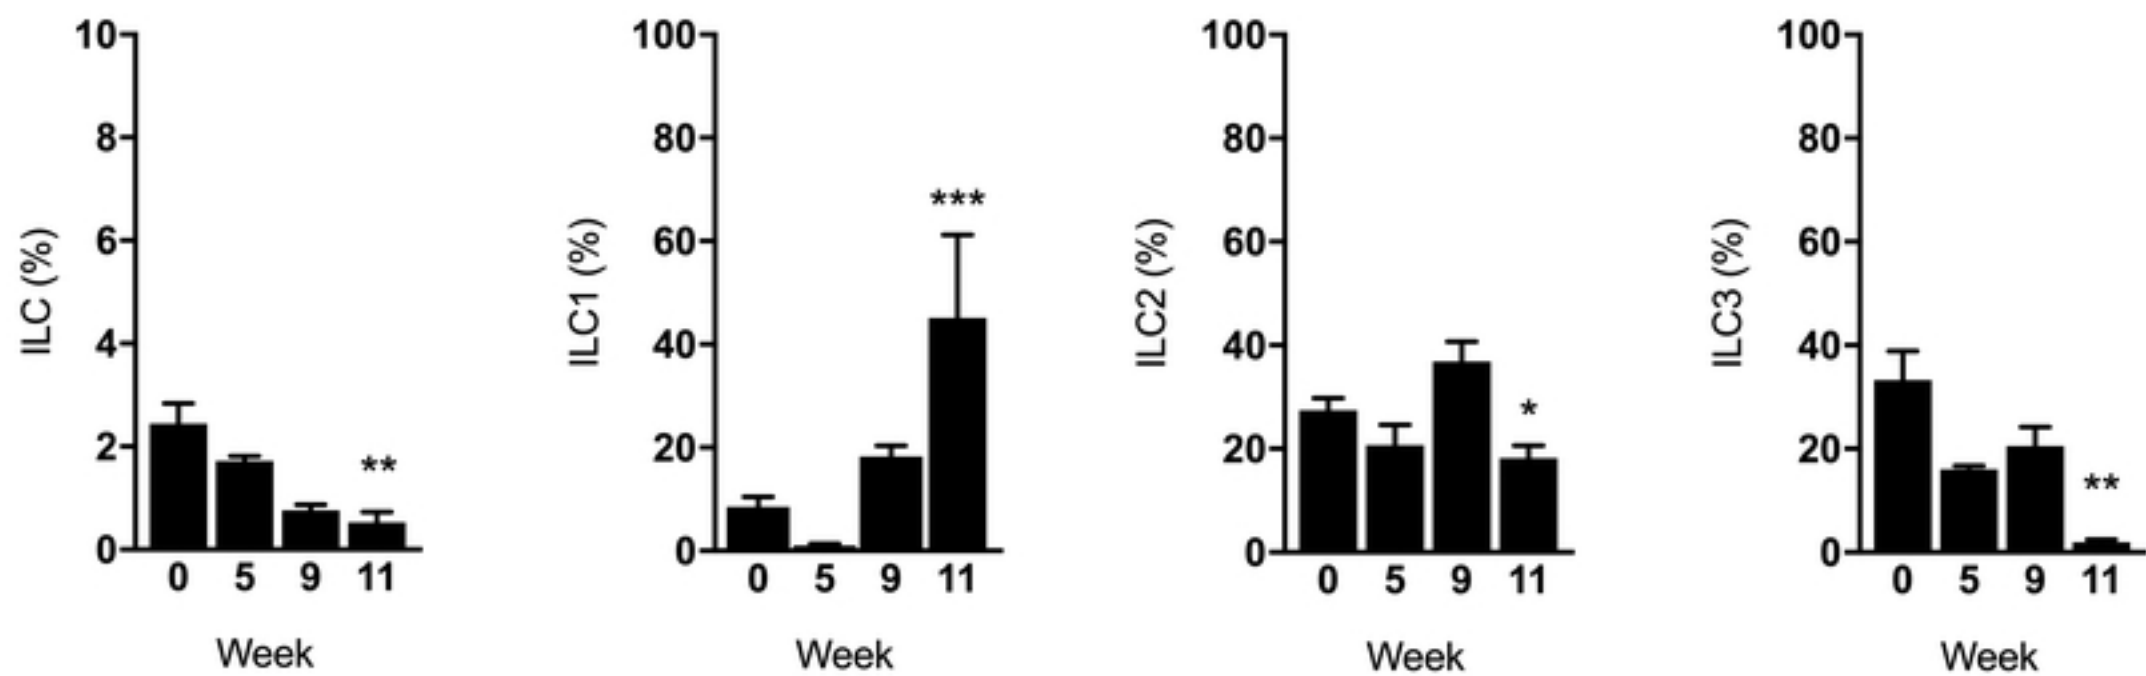

**B**

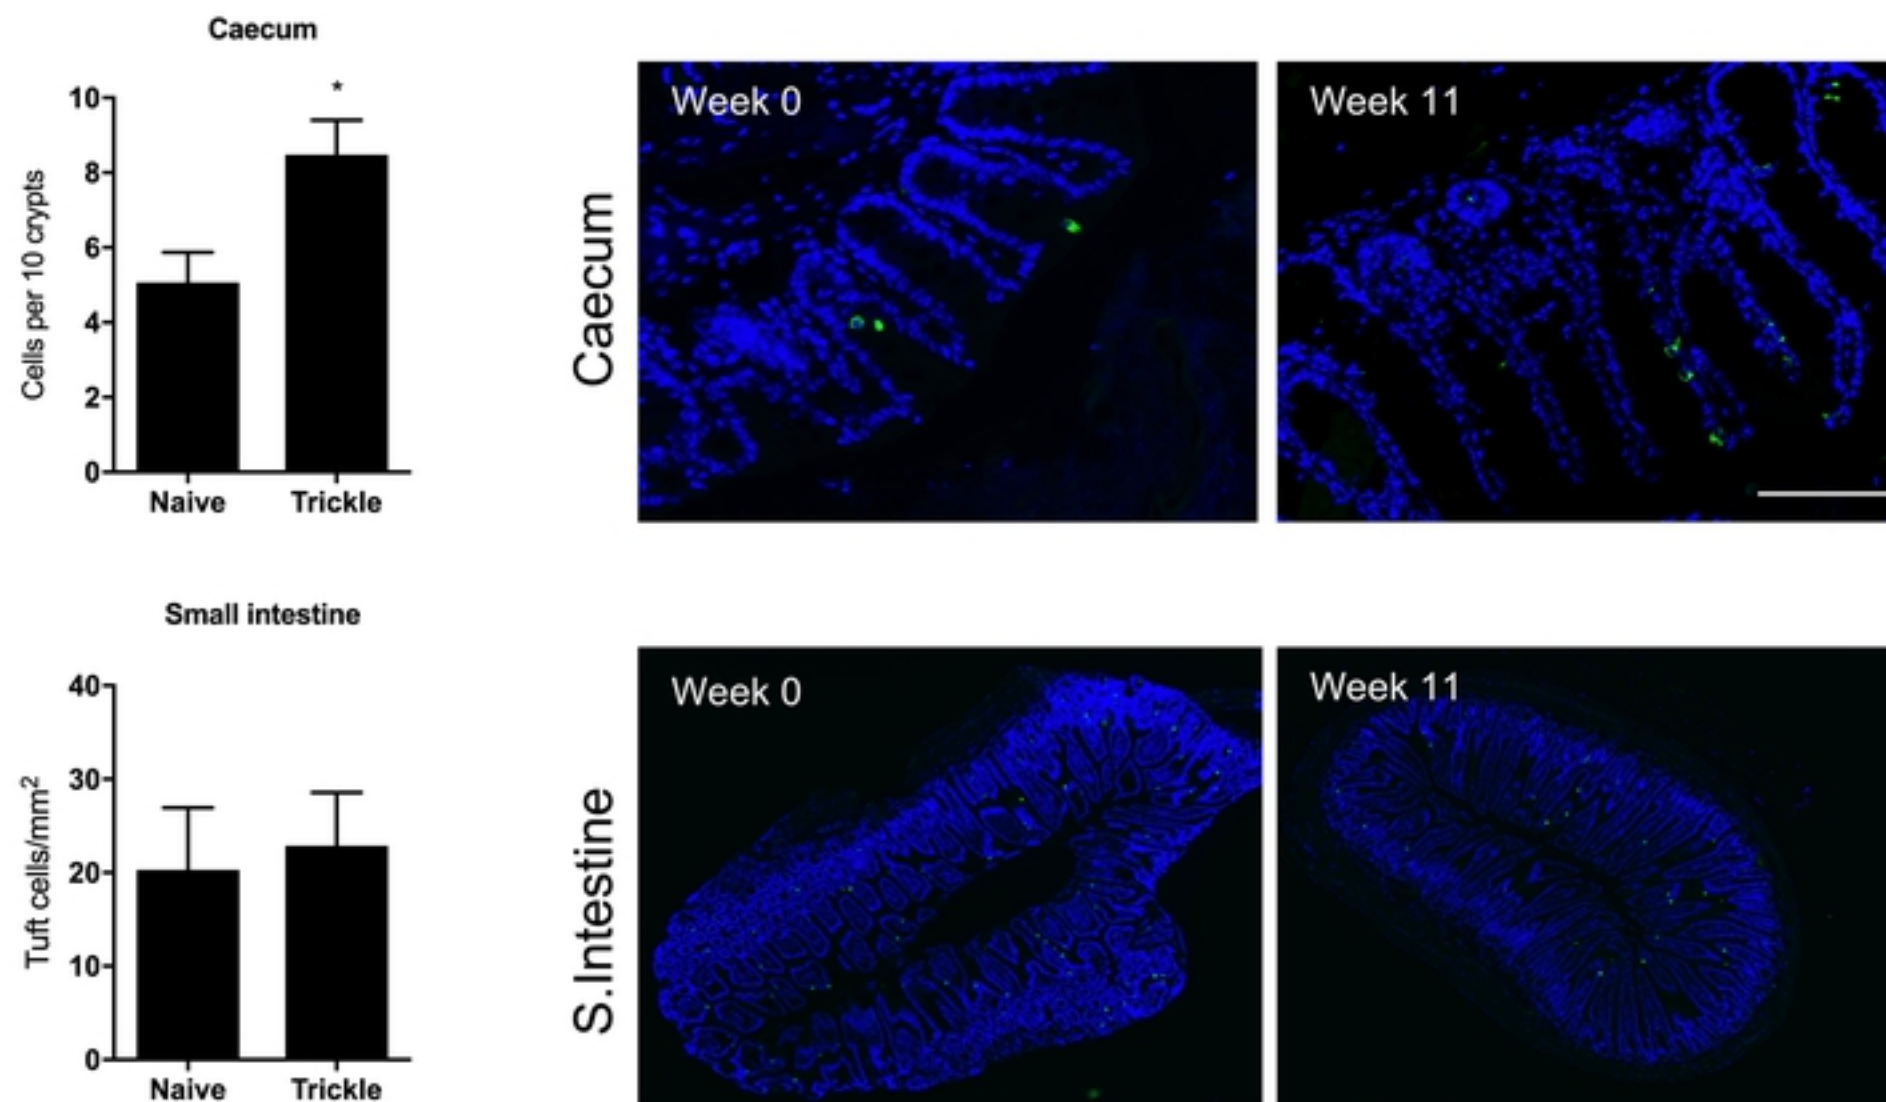

**A**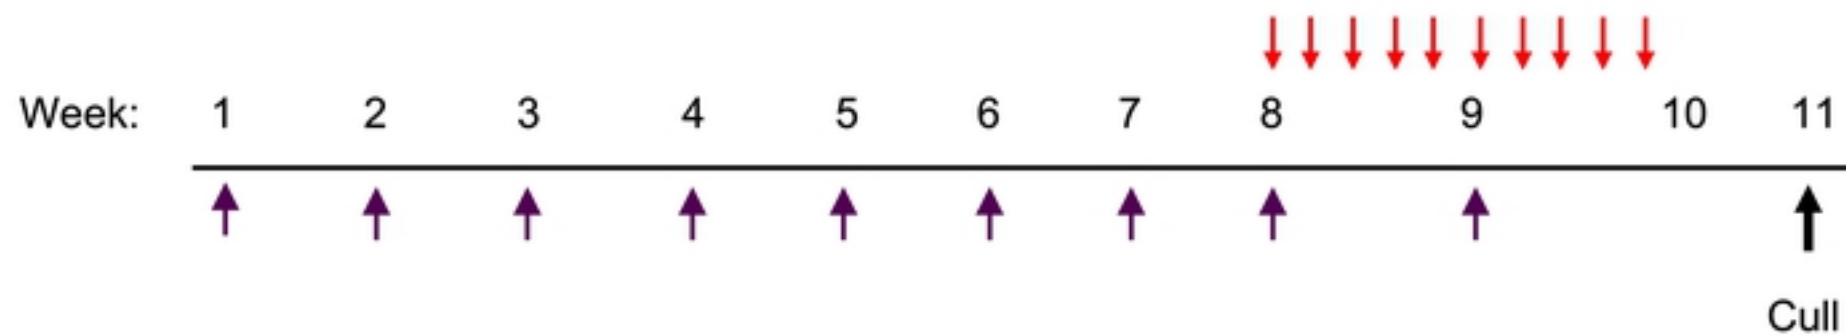**B**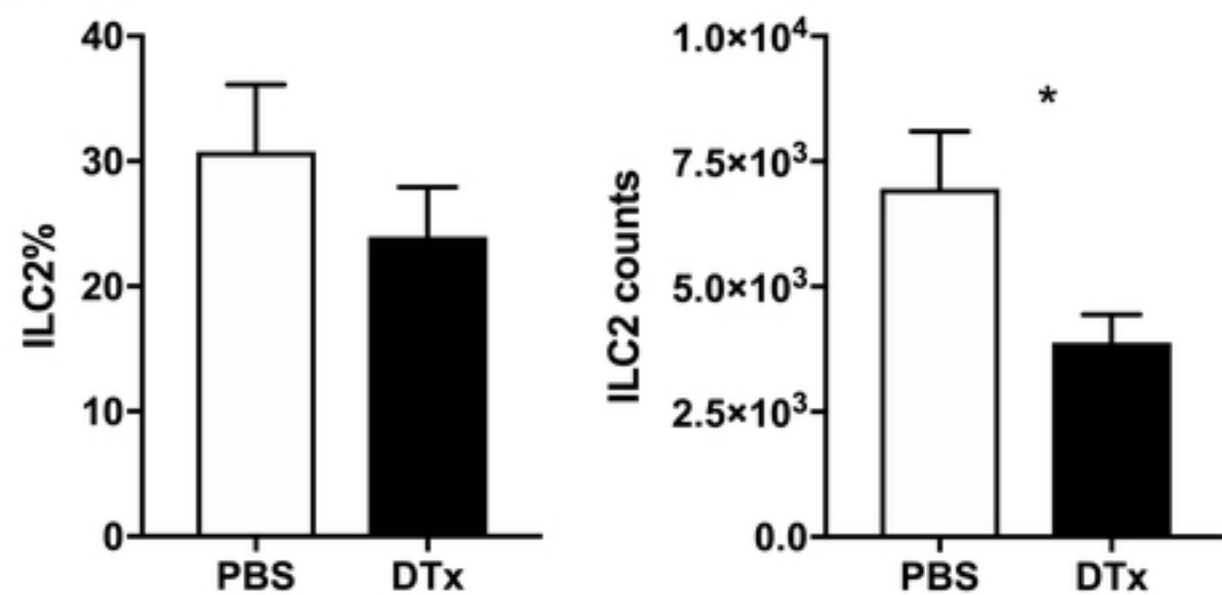**C**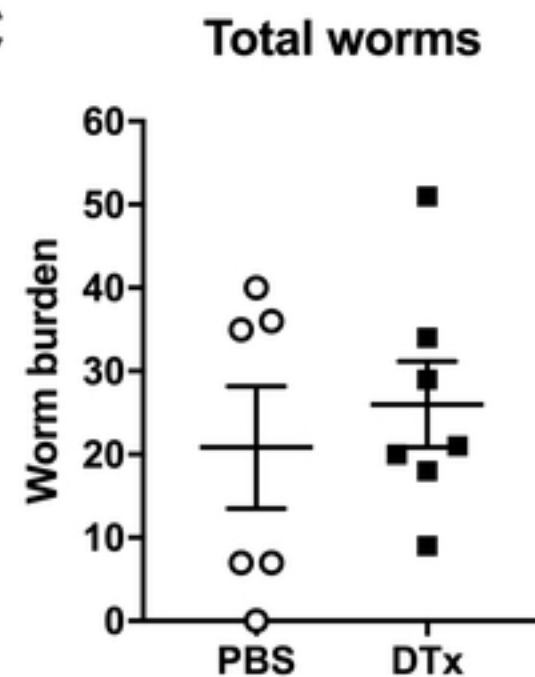**D**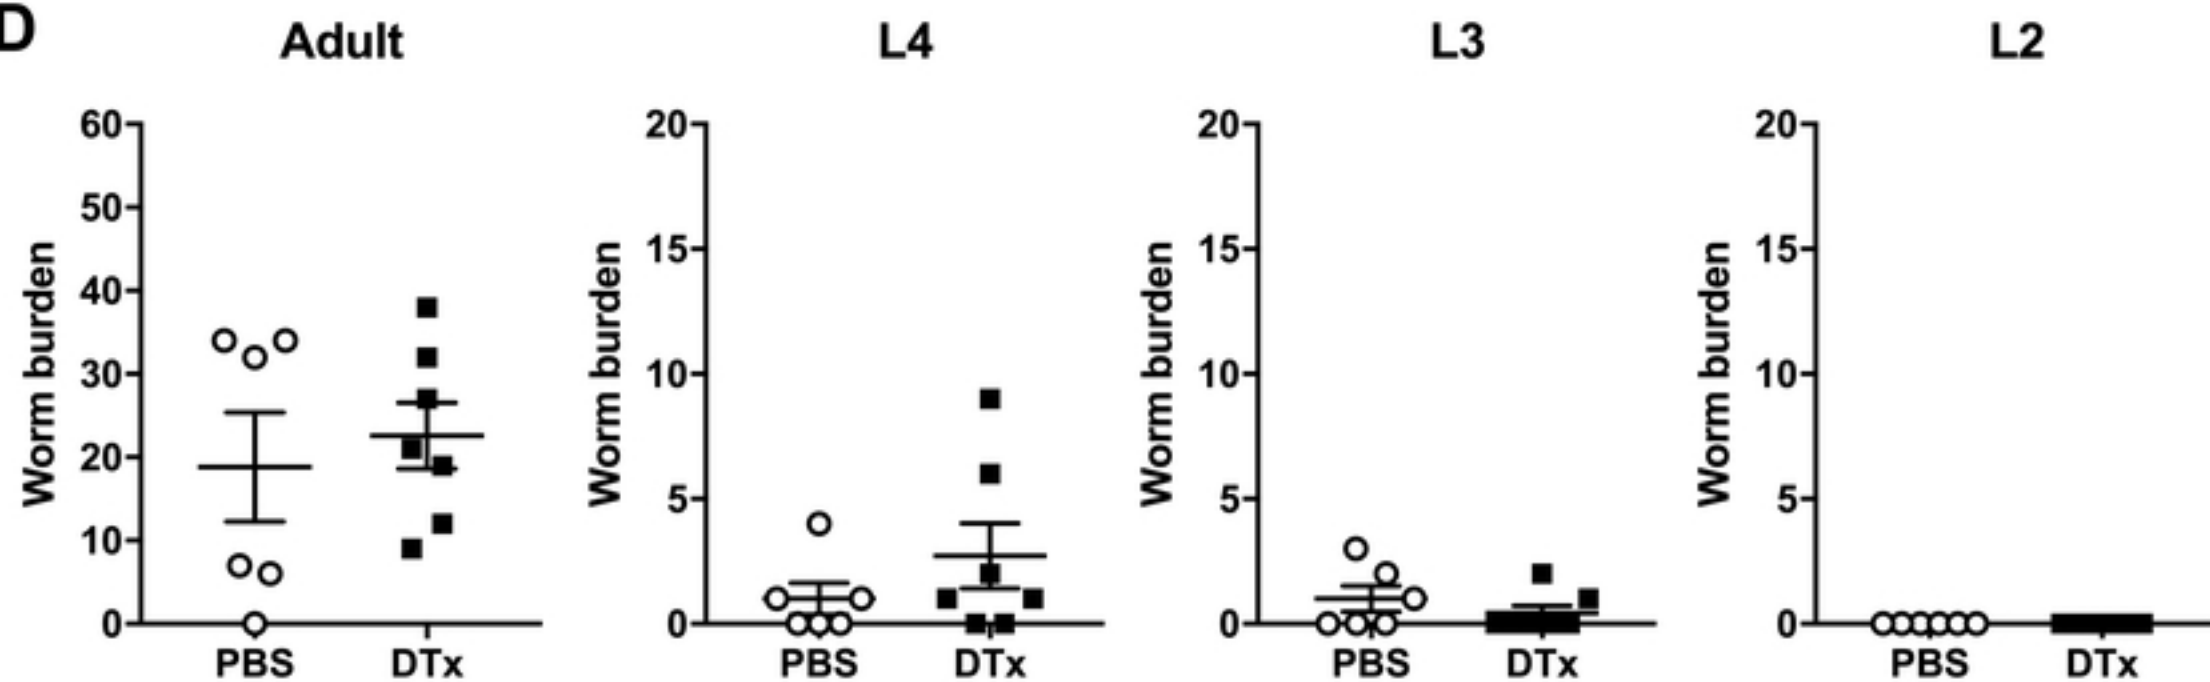

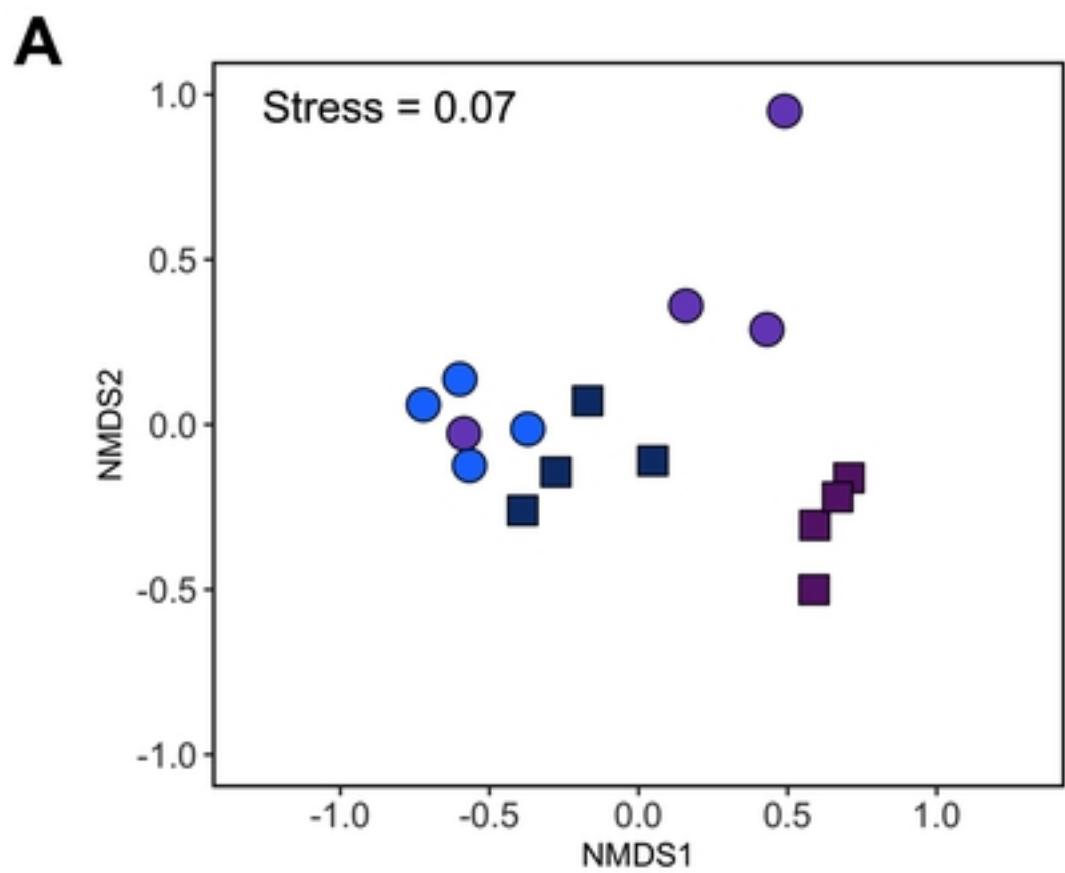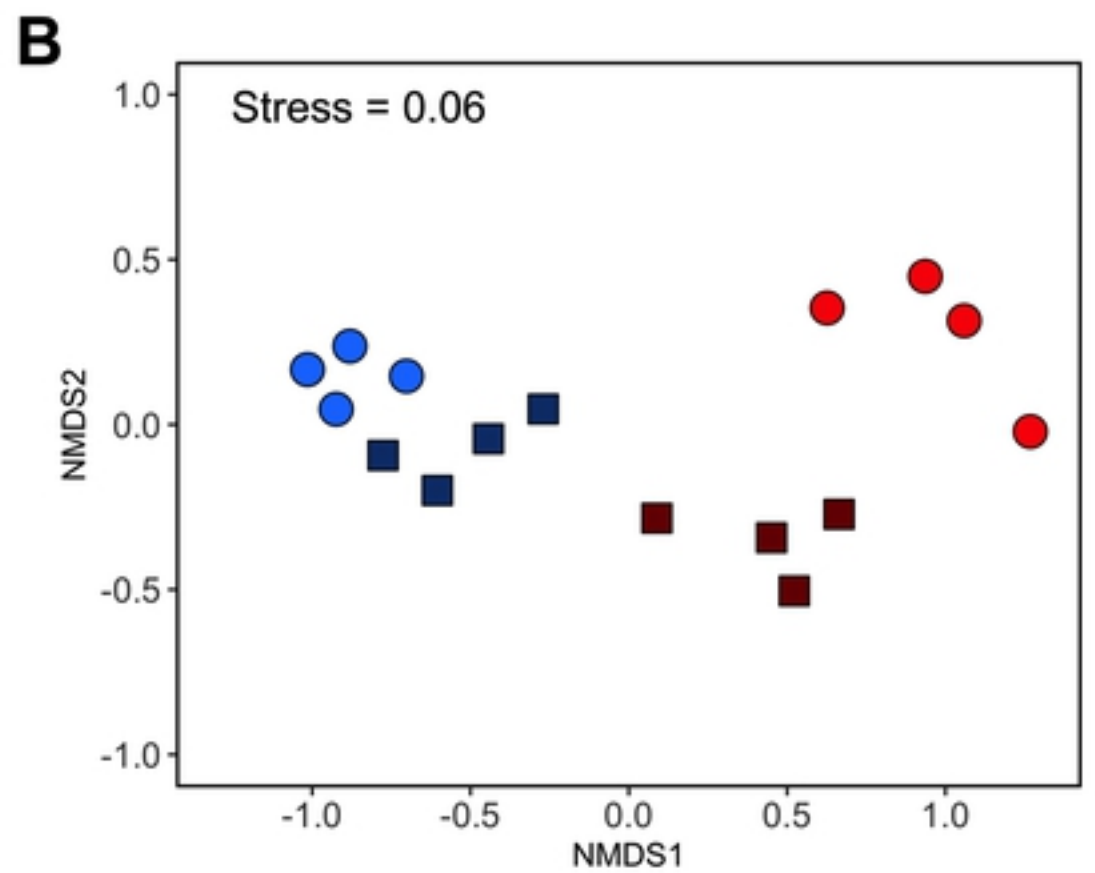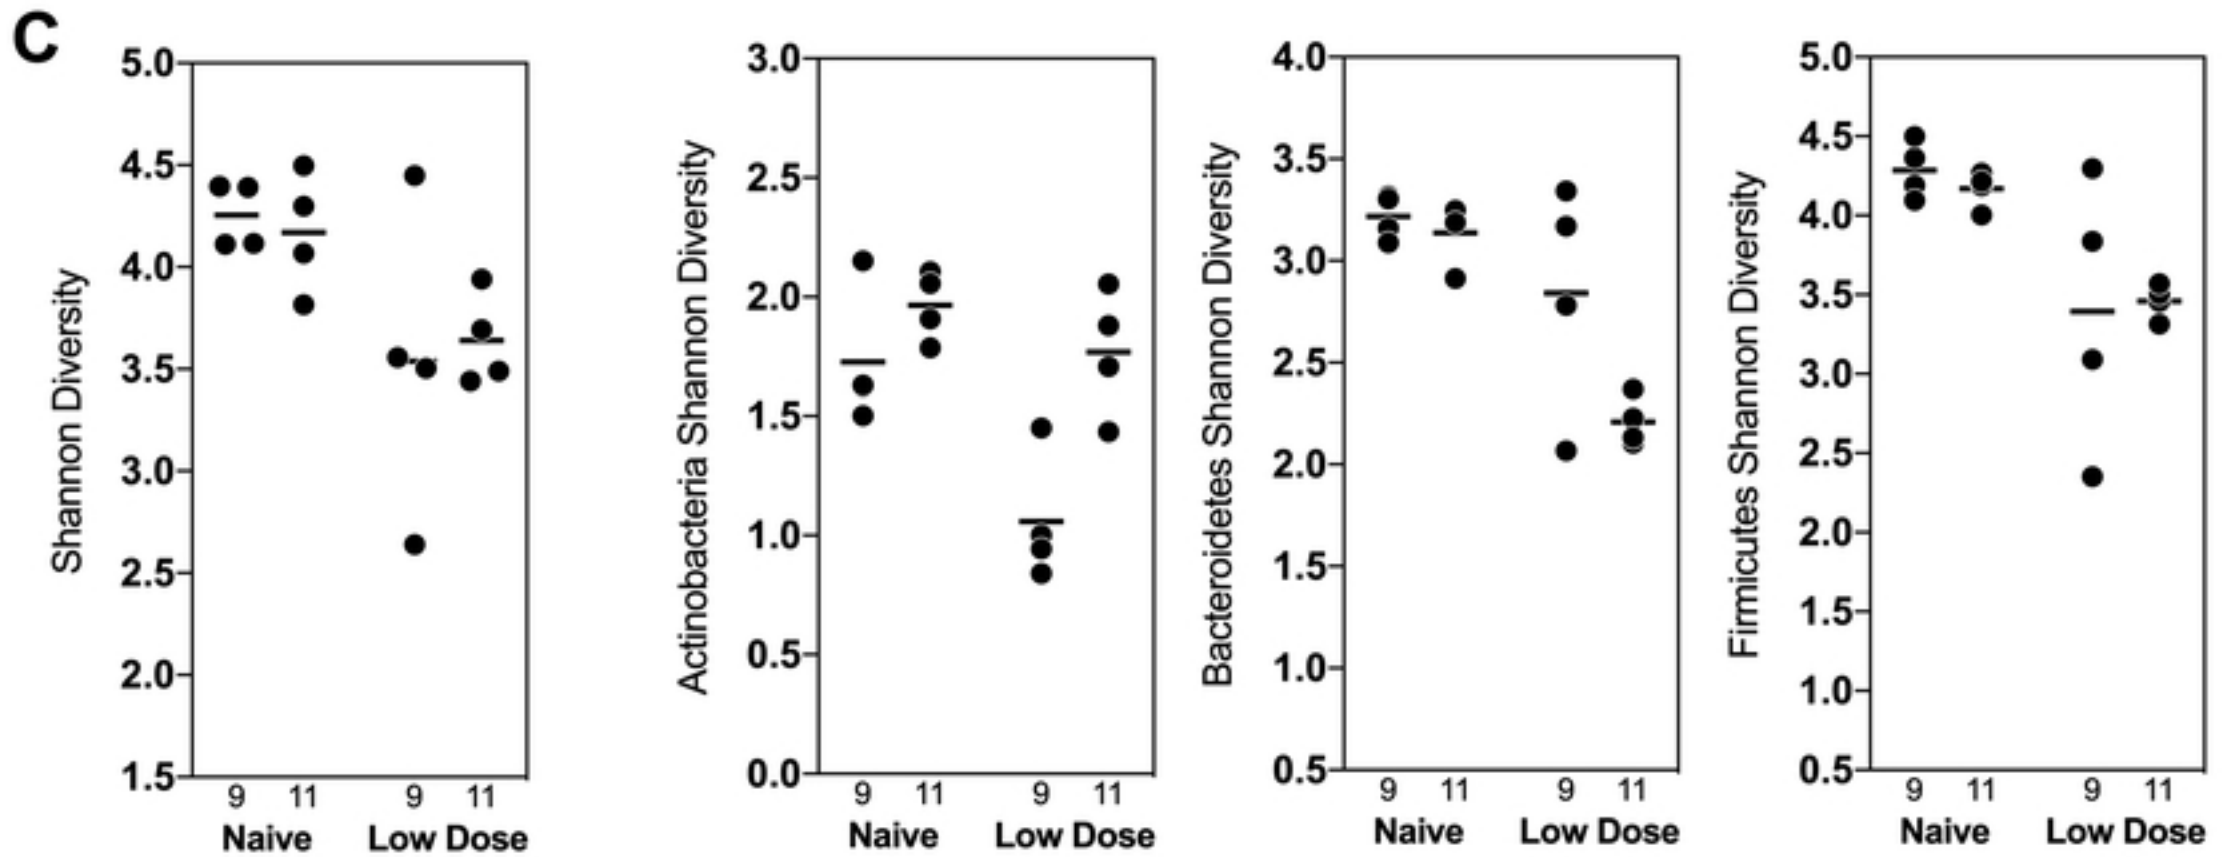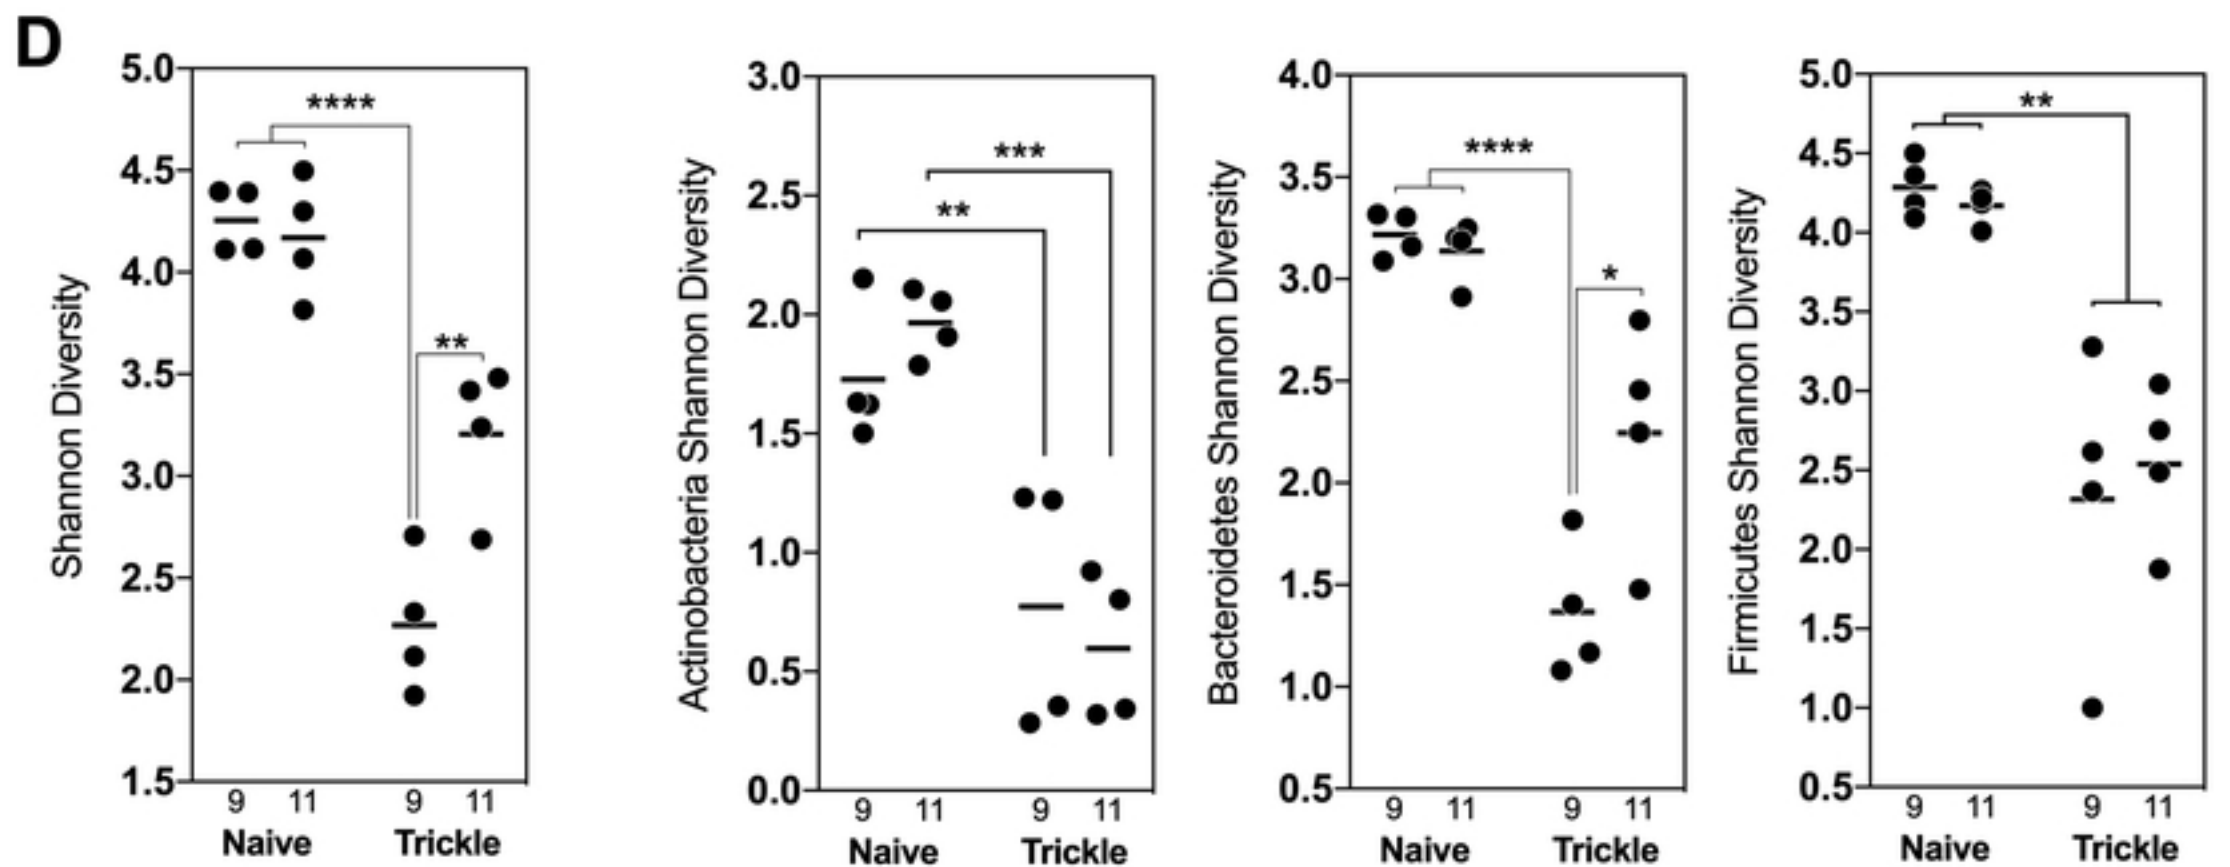

bioRxiv preprint doi: <https://doi.org/10.1101/677096>; this version posted June 19, 2019. The copyright holder for this preprint (which was not certified by peer review) is the author/funder, who has granted bioRxiv a license to display the preprint in perpetuity. It is made available under aCC-BY 4.0 International license.

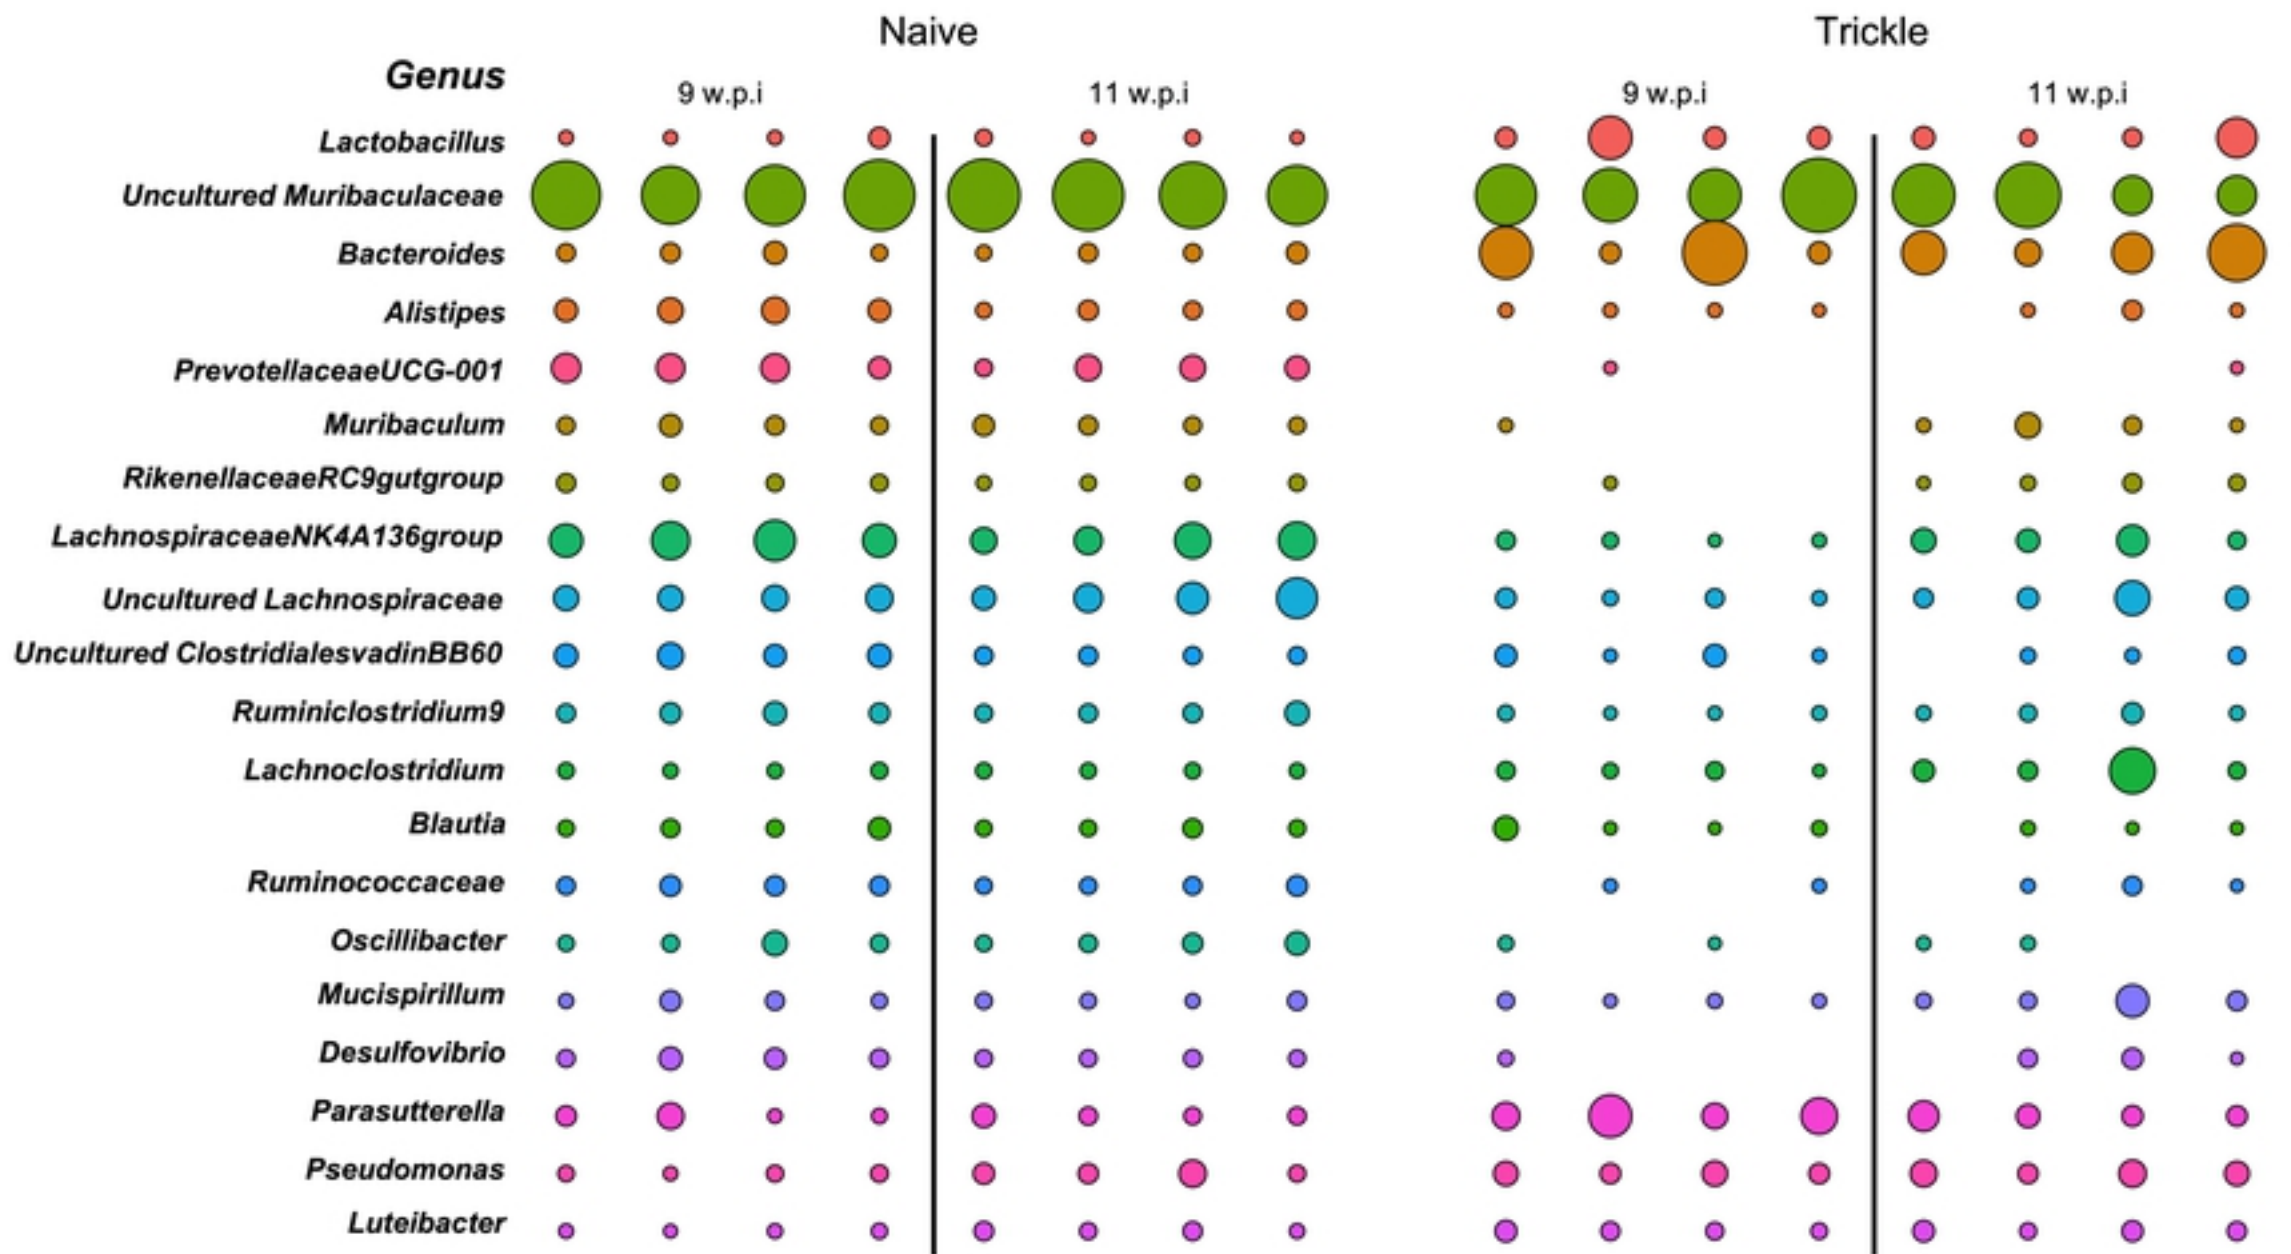

Scale ○ 0.2 ○ 0.4 ○ 0.6
